# Supplementary material for: CRISPR-Cas12a has both cis- and trans-cleavage activities on single-stranded DNA
Source: PubMed Central journal article supplement (PMC5939048; doi:10.1038/s41422-018-0022-x), 2018-03-12
Supplement: 41422_2018_22_MOESM1_ESM.pdf [file 41422_2018_22_MOESM1_ESM.pdf]

## **Supplementary information, Materials and Methods**

### **Generation of dsDNA targets**

Short dsDNA targets were prepared through annealing of two complementary oligonucleotides (see Table S2). Paired oligonucleotides (0.8  $\mu$ M) were annealed in 1 $\times$ PCR buffer (Transgen Biotech) in a total volume of 50  $\mu$ L, and then subjected to the annealing program: initial denaturation at 95  $^{\circ}$ C for 5 min and then cool down from 95  $^{\circ}$ C to 20  $^{\circ}$ C with 1  $^{\circ}$ C decrease per min using a thermocycler.

### **Transcription of crRNAs**

First, the transcription templates were prepared through annealing of the synthesized oligonucleotides with T7-crRNA-F (Table S3), following the same procedures as previously described<sup>1-2</sup>. crRNAs were synthesised using the T7 High Yield Transcription Kit (ThermoFisher Scientific) and the reaction was performed at 37  $^{\circ}$ C overnight (about 16 h). RNA was purified using the RNA Clean & Concentrator<sup>TM</sup>-5 (Zymo Research) and quantified with NanoDrop 2000C (ThermoFisher Scientific).

### **Purification of Cas12a proteins**

Ten Cas12a coding sequences were codon-optimised and synthesized by Tolo Biotech (Shanghai, China) and then cloned into pET28a (Novagen) with N-terminal 6 $\times$ His tagging. Oligonucleotides for the construction of site-directed Cas12a mutants are listed in Table S4. For example, to obtain FnCas12a mutants, plasmid pET28a-FnCas12a was amplified by a pair of primers, the products of which were digested with DpnI (1 h, 37  $^{\circ}$ C) before being transformed into DH10B competent cells. The whole *Cas12a* gene was verified by DNA sequencing before being used for protein expression and purification. Other mutants were obtained following the same procedure.

Cas12a expression plasmids were transformed into *E. coli* BL21 (DE3) (Table S5). For protein expression, a single clone was first cultured overnight in 5-mL liquid LB tubes and then 1% (v/v) inoculated into 3 L of fresh liquid LB. Cells were grown with shaking at 220 rpm and 37  $^{\circ}$ C until the OD<sub>600</sub> reached 0.8, and IPTG was then added to a final concentration of 0.2 mM followed by further culture of the cells at 16  $^{\circ}$ C for about 16 h before the cell harvesting.

Cells were resuspended in 50 mL of lysis buffer [50 mM Tris-HCl (pH 8.0), 1.5 M NaCl, 1 mM DTT and 5% glycerol] with 1 mM PMSF as the protease inhibitor and lysed by high pressure. The obtained lysate was then centrifuged twice at 15,000 rpm for 30 min. After centrifuging, the supernatant was mixed with 5 mL of Ni-NTA beads (GE Healthcare) and softly shaken for 1 h at 4 °C before being loaded onto a 30-mL column. The packing was then washed with wash buffer (lysis buffer supplemented with 30 mM imidazole) and eluted with elution buffer (lysis buffer supplemented with 600 mM imidazole). The elution was dialysed with dialysis buffer 1 [50 mM Tris-HCl (pH 8.0), 200 mM NaCl, 1 mM DTT and 5% glycerol]. Before the protein solution was loaded onto an anion exchange column (HiTrap™ Q HP, GE Healthcare), it was diluted until the final NaCl concentration reached below 80 mM. After that, the column was washed and then eluted with a gradient concentration of NaCl (AKTA Pure, GE Healthcare). Fractions containing Cas12a proteins were verified by SDS-PAGE and then pooled for dialysis with dialysis buffer 2 [20 mM Tris-HCl (pH 8.0), 600 mM NaCl, 2 mM DTT, 0.2 mM EDTA] overnight. Finally, the protein was collected and diluted to a final concentration of 6 µM and mixed with an equal volume of 100% cold glycerol prior to being frozen at -80 °C.

### ***In vitro* cleavage assay**

Unless mentioned otherwise, FnCas12a was used for the cleavage assays in this study. For the cleavage of target plasmid, the *in vitro* cleavage system contained 500 ng of target DNA, 250 nM Cas12a and 500 nM synthesised crRNA in a 20-µL reaction system. The reaction was performed at 37 °C in NEB buffer 3 for 1 h. For cleavage of M13mp18 by Cas12a, the reaction was performed at 37 °C in NEB buffer 3 for 30 min, employing 100 nM Cas12a, 250 nM synthesised crRNA, 1 µg M13mp18 DNA, 40 nM *trans* ssDNA and 10 U RNase inhibitor (Takara) in a 20-µL volume. For cleavage of M13mp18 by exonuclease T (NEB), the reaction was incubated at 25 °C for 30 min in NEB buffer 4.

Cleavage of FAM-labelled single-stranded oligonucleotides or double-stranded oligonucleotides was performed at 37 °C in NEB buffer 3 for 1 h, employing 250 nM Cas12a, 500 nM synthesised crRNA, 40 nM target DNA or/and 40 nM *trans* ssDNA and 10 U RNase inhibitor (Takara) in a 20-µL volume. Reactions were stopped by heating at 98 °C for 10 min, followed by immediately chilling on ice before further analysis through urea PAGE. For the time-course experiments in Supplementary information Figure S2a, the final

concentration of crRNA and Cas12a was reduced to 100 nM.

For LC-MS detection, cleavage of samples was performed in NEB buffer 3 at 37 °C for 2 h, containing 1 μM FnCas12a, 1 μM synthesised crRNA-T1, 1 μM target DNA (target-T1-18), 25 μM *trans* ssDNA (10T-FAM-5' or 10T-FAM-3') and 10 U RNase inhibitor.

#### **Analysis of Cas12a-digested products by denaturing urea PAGE or LC-MS**

To analyze the products by urea PAGE, FAM-labelled DNA was first digested by Cas12a and then heated at 98 °C for 10 min after the addition of loading buffer to stop the reactions. Heated samples were immediately chilled on ice, followed by being loaded on 10%–15% denaturing polyacrylamide gels containing 7 M urea. Electrophoresis was performed by running at 1800 V (about 40 V/cm) for about 70–90 min (using the Sequi-Gen GT Sequencing Cell system, Bio-Rad) or at 200 V (about 40 V/cm) for about 25 min (using the Mini-PROTEAN Tetra Cell system, Bio-Rad) in 1× TBE buffer. Gels were scanned using a FLA-9000 phosphoimager (FujiFilm Corporation, Japan).

For LC-MS analysis, FnCas12a-digested samples were first de-salted using a Novatia Oligo HTCS trap column (C18 300A, 1×10 mm), and were then analyzed with a Thermo LCQ ion trap with an ESI source (negative ion mode), where the electrospray gas was heated to about 300 °C. The liquid phase conditions are HFIPA-based aqueous reagents, and the system was operated with a flow of 40% ACN mixed with 40% MeOH and 20% water.



**Supplementary information, Table S3 Oligonucleotides used for preparation of transcription templates in this study**

| <b>Oligo names</b>   | <b>Sequences (5'-3')</b>                                                       |
|----------------------|--------------------------------------------------------------------------------|
| T7-crRNA-F           | GAAATTAATACGACTCACTATAGGG                                                      |
| T7-T1-24-R           | gaattcagtagaaagttgcgataaATCTACAACAGTAGAAATTCCTATAGT<br>GAGTCGTATTAATTTTC       |
| T7-T1-8-R            | tgcgataaATCTACAACAGTAGAAATTCCTATAGTGAGTCGTATT<br>AATTTTC                       |
| T7-T1-10-R           | gttgcgataaATCTACAACAGTAGAAATTCCTATAGTGAGTCGT<br>ATTAATTTTC                     |
| T7-T1-12-R           | aagttgcgataaATCTACAACAGTAGAAATTCCTATAGTGAGTCGT<br>ATTAATTTTC                   |
| T7-T1-14-R           | gaaagttgcgataaATCTACAACAGTAGAAATTCCTATAGTGAGT<br>CGTATTAATTTTC                 |
| T7-T1-15-R           | agaagttgcgataaATCTACAACAGTAGAAATTCCTATAGTGAGT<br>CGTATTAATTTTC                 |
| T7-T1-16-R           | tagaaagttgcgataaATCTACAACAGTAGAAATTCCTATAGTGAG<br>TCGTATTAATTTTC               |
| T7-T1-17-R           | gtagaaagttgcgataaATCTACAACAGTAGAAATTCCTATAGTGAG<br>TCGTATTAATTTTC              |
| T7-T1-18-R           | agtagaaagttgcgataaATCTACAACAGTAGAAATTCCTATAGTGA<br>GTCGTATTAATTTTC             |
| T7-T1-20-R           | tcagtagaaagttgcgataaATCTACAACAGTAGAAATTCCTATAGTG<br>AGTCGTATTAATTTTC           |
| T7-T1-22-R           | attcagtagaaagttgcgataaATCTACAACAGTAGAAATTCCTATAGT<br>GAGTCGTATTAATTTTC         |
| T7-T1-30-R           | aagcttgaattcagtagaaagttgcgataaATCTACAACAGTAGAAATTCCT<br>ATAGTGAGTCGTATTAATTTTC |
| T7-crRNA-DNMT-23nt-R | GAGTAACAGACATGGACCATCAGATCTACAACAGTAGAAATT<br>CCCTATAGTGAGTCGTATTAATTTTC       |
| T7-crRNA-DNMT-(-8)-R | gacatggaccatcaggaacattATCTACAACAGTAGAAATTCCTATAGT<br>GAGTCGTATTAATTTTC         |
| T7-crRNA-DNMT-(+4)-R | aggcgagtaacagacatggaccaATCTACAACAGTAGAAATTCCTATAG<br>TGAGTCGTATTAATTTTC        |
| T7-crRNA-DNMT-(+8)-R | tgacaggcgagtaacagacatggATCTACAACAGTAGAAATTCCTATAG<br>TGAGTCGTATTAATTTTC        |
| T7-crRNA-DNMT-16nt-R | agacatggaccatcagATCTACAACAGTAGAAATTCCTATAGTGAGT<br>CGTATTAATTTTC               |
| T7-crRNA-DNMT-18nt-R | acagacatggaccatcagATCTACAACAGTAGAAATTCCTATAGTGA<br>GTCGTATTAATTTTC             |
| T7-crRNA-DNMT-20nt-R | taacagacatggaccatcagATCTACAACAGTAGAAATTCCTATAGTG<br>AGTCGTATTAATTTTC           |
| T7-T2-R              | ctagagtaaagcttgaattcagtaATCTACAACAGTAGAAATTCCTATAG<br>TGAGTCGTATTAATTTTC       |
| T7-T3-R              | ggatccactagtctctagctcgaATCTACAACAGTAGAAATTCCTATAGT<br>GAGTCGTATTAATTTTC        |
| T7-T4-R              | ttcaaggagaaactgcagctagctATCTACAACAGTAGAAATTCCTATAG<br>TGAGTCGTATTAATTTTC       |

**Supplementary information, Table S4 Oligonucleotides used for plasmids construction in this study**

| <b>Oligo names</b> | <b>Sequences (5'-3')</b>            |
|--------------------|-------------------------------------|
| FnCas12a-K869A-F   | gcttgtctgcgatcagatcgtactcgaacacg    |
| FnCas12a-K869A-R   | atctgatcgcagacaagcgggtcaccgaggataag |
| FnCas12a-K852A-F   | tgctctatttgcggtggcgatggcctcctggc    |
| FnCas12a-K852A-R   | atcgcacaacgcaataaggacaatcctaagaagg  |
| FnCas12a-H843A-F   | ttggctggtgctgtgatcttcttagggatggac   |
| FnCas12a-H843A-R   | agaagatcacagcaccagccaaggaggccatcg   |

|                   |                                          |
|-------------------|------------------------------------------|
| FnCas12a-R1218A-F | ggtcttgctgttgccatctgcaggattgtattc        |
| FnCas12a-R1218A-R | tcctgcagatggccaacagcaagaccggcacagagc     |
| FnCas12a-E1006A-F | agttcagatctgcgaaccacgatggcattg           |
| FnCas12a-E1006A-R | tcgtggtgttcgagatctgaacttcggctttaagag     |
| FnCas12a-D917A-F  | tctgccccgtgcgatgctcaggatgtcacatcg        |
| FnCas12a-D917A-R  | tcctgagcatgcacggggcgagagacactgg          |
| FnCas12a-D1255A-F | gcgccgftggctgcggcatcctgaggcatattctgg     |
| FnCas12a-D1255A-R | ctcaggatgccgcagccaacggcgctatcacatcggcctg |

**Supplementary information, Table S5 Plasmids and strains used in this study**

| <b>Plasmids or Strains</b>  | <b>Relevant properties or genotypes</b>                                                                                                                                            | <b>Sources</b> |
|-----------------------------|------------------------------------------------------------------------------------------------------------------------------------------------------------------------------------|----------------|
| <b>Plasmids</b>             |                                                                                                                                                                                    |                |
| pET28a-TEV                  | pET28a with the thrombin cleavage site changed to the TEV protease cleavage site                                                                                                   | <sup>3</sup>   |
| pET28a-TEV-FnCas12a         | pET28a-TEV carrying FnCas12a                                                                                                                                                       | <sup>1</sup>   |
| pET28a-TEV-AsCas12a         | pET28a-TEV carrying AsCas12a                                                                                                                                                       | <sup>2</sup>   |
| pET28a-TEV-LbCas12a         | pET28a-TEV carrying LbCas12a                                                                                                                                                       | <sup>2</sup>   |
| pET28a-TEV-Lb5Cas12a        | pET28a-TEV carrying Lb5Cas12a                                                                                                                                                      | This study     |
| pET28a-TEV-HkCas12a         | pET28a-TEV carrying HkCas12a                                                                                                                                                       | This study     |
| pET28a-TEV-OsCas12a         | pET28a-TEV carrying OsCas12a                                                                                                                                                       | This study     |
| pET28a-TEV-TsCas12a         | pET28a-TEV carrying TsCas12a                                                                                                                                                       | This study     |
| pET28a-TEV-BbCas12a         | pET28a-TEV carrying BbCas12a                                                                                                                                                       | This study     |
| pET28a-TEV-BoCas12a         | pET28a-TEV carrying BoCas12a                                                                                                                                                       | This study     |
| pET28a-TEV-Lb4Cas12a        | pET28a-TEV carrying Lb4Cas12a                                                                                                                                                      | This study     |
| pET28a-TEV-FnCas12a-K869A   | pET28a-TEV carrying FnCas12a-K869A                                                                                                                                                 | This study     |
| pET28a-TEV-FnCas12a-K852A   | pET28a-TEV carrying FnCas12a-K852A                                                                                                                                                 | This study     |
| pET28a-TEV-FnCas12a-H843A   | pET28a-TEV carrying FnCas12a-H843A                                                                                                                                                 | This study     |
| pET28a-TEV-FnCas12a-R1218A  | pET28a-TEV carrying FnCas12a-R1218A                                                                                                                                                | This study     |
| pET28a-TEV-FnCas12a-E1006A  | pET28a-TEV carrying FnCas12a-E1006A                                                                                                                                                | This study     |
| pET28a-TEV-FnCas12a-D917A   | pET28a-TEV carrying FnCas12a-D917A                                                                                                                                                 | This study     |
| pET28a-TEV-FnCas12a-D1255A  | pET28a-TEV carrying FnCas12a-D1255A                                                                                                                                                | This study     |
| M13mp18 single-stranded DNA |                                                                                                                                                                                    | NEB            |
| pCB1A2_2                    |                                                                                                                                                                                    | <sup>2</sup>   |
| <b>Strains</b>              |                                                                                                                                                                                    |                |
| <i>E. coli</i> DH10B        | F <sup>-</sup> <i>endA1 deoR<sup>+</sup> recA1 galE15 galK16 nup G rpsL Δ(lac)X74 φ80lacZΔM15 araD139 Δ(ara, leu)7697 mcrA Δ(mrr-hsdRMS-mcrBC)</i> Str <sup>R</sup> λ <sup>-</sup> | Invitrogen     |
| <i>E. coli</i> BL21(DE3)    | F <sup>-</sup> <i>ompT gal dcm lon hsdSB(rB- mB-) λ(DE3 [lacI lacUV5-T7 gene 1 ind1 sam7 nin5])</i>                                                                                | Invitrogen     |

## Supplementary information, nucleotide sequences used in this study

>FnCas12a (codon-optimised DNA sequence)

```
atgagcatctatcaggagttcgtgaataagtacagcctgtccaagaccctcgggttgagctgatccccaggcgaagacactggagaacatcaaggccagggg
cctgatcctggacgatgagaagcgcgccaaggactataagaaggccaagcagatcatcgataaagaccaccagttcctttatcaggagatcctgagcagcgtgtg
catctctgaggatctgctgcagaattacagcgacgtgtattcaagctgaagaagctgacgatgacaacctgcagaaggactcaagagcgccaaggacaccatc
aagaagcagatcagcaggtatatacaaggactccgagaagtttaagaatctgttcaaccagaatctgatcgatgccaagaaggccaggagtcgacctgatcctgt
ggctgaagcagctctaaaggacaatggcatcgagctgtcaaggccaactctgatatcaccgatatcgacgagccctggagatcatcaagagctttaaggctgga
ccacatactttaaggctccacgagaacaggaagaacgtgtacagcagcaacgacatccctacaagcatcatctaccgcatctggatgacaatctgccaaagt
cctggagaacaaggccaagtatgagtcctgaaggacaaggccccgagccatcaattacgagcagatcaagaaggatctggccgaggagctgaccttcgat
atcgactataagacatccgaggtgaaccagcgggtgtttctctggacgaggtgtttgagatcgccaattcaacaattacctgaaccagtcggcatcaccagttc
aataaatcatcggcggcaagtttgaaccggcgagaataccaagagaaaggcacaacgagatcaatctgtatagccagcagatcaacgacaagaccct
gaagaagtacaagatgagcgtgctgttcaagcagatcctgtccgatacagagtctaagagctttgtatcgataagctggaggatgactctgacgtgtgaccaca
atgcagagctttatgagcagatcgccgctcaagaccgtggaggagaagctatcaaggagacactgagcctgtctgttcgatgacctgaagccccagaagctg
gacctgtctaatgactactcaagaacgataagtcctgaccgacctgtctcagcaggtgtttgatgactatagcgtgatcggcaccgctgtggagctacatcaca
cagcagatcggccaaagaacctggataatccctctaagaaggagcagagctgatcgccaagaagaccgagaaggccaagtatctgagcctggagacaatca
agctggccctggaggagttaataagcaccgggatacgacaagcagtgacagattgaggagatcctggccaacttcgcccatccccatgatctttgatgagat
cgccccagaacaaggacaatctggcccagatcctcatcaagtaccagaaccaggcgaagaagcagctgtgcaggcctctgccgaggatgacgtgaaggccat
caaggatctgctggaccagaccaacaatctgctgcacaagctgaagatctccacatctccagctctgaggataaggccaatctctggataaggacgagcactttt
atctggtgttcgaggagtgacttccgagctggccaacatcgtgccctgtfacaacaagatcagaattatatacacagaagccttactccgacgagaagtttaagc
tgaacttcgagaacagcaccctggccaacggctgggataagaataaggagcctgacaacacagccatcctgttcatcaaggatgacaagtactatctggcgta
tgaataagaagaacaataagatcttcgatgacaaggccatcaaggagaacaaggcgagggtacaagaagatcgtgtataagctgctgccggcgccaataa
gatgctgcctaagggttctttccgccaagtctatcaagttctacaacccatccgaggacatcctcgggatcagaatcactcccccacacaaagaacggctctcc
ccagaagggtatgagaagttgagttcaatatacaggattgccggaagttatcgacttctacaagcagagcatctcaagcaccctgagtggaaggattttggctt
caggtttagcgacaccagcgggtacaactccatcgacgagttctacagagaggtggagaatcagggtataagctgacatttgagaacatctctgagagctacatc
gacagcgtgtgtaatcagggcaagctgtacctgttccagatctataacaaggacttcagcgcctatccaaggcggccaaacctgcacaccctgtactggaag
gccctgttcgatgagagaaatctgcaggacgtggtgtataagctgaacggcgaggccgagctgttttacggaagcagctccatccctaagaagatcacacacca
gccaaggaggccatcgccaacaagaataaggacaatcctaagaaggagagcgtgttcgagtagctgatcaaggacaagcggttcaccgaggataagttcttt
ttcactgtccaatcacaatcaactcaagtcctctggcgccaacaagtttaatgacgagatcaatctgctgtgaaaggagaaggccaacgatgtgcacatctgag
catcgaccggggcgagagacacctggcctactataccctggtggatggcaagggaatatcatcaagcaggataccttcaacatcatcggaatgacaggatga
agacaaactaccagataagctggcccatcgagaaggataggactcccccgaaggactggaagaagatcaacaatatcaaggagatgaaggaggggt
atctgtctcaggtgtgacagatcgccaagctggtcatcgagtacaatgccatcgtggtgttcgaggatctgaactcggcttaagagggggcctttaaagggtg
gagaagcaggtgtatcagaagctggagaagatgctgatcagaagctgaattacctggtgttaaggataacgagttcgacaagaccggagcgtgctgagggc
ataccagctgaccggccctttgagacattcaagaagatgggcaagcagacagacatcactatgtccagccggcttacctcaagatctggccgtgaca
ggctttgtgaaccagctgtaccctaaagtatgagtcctgtctaaagagccaggaggttttcgcaagttcgataagatctgtataatctggacaagggtacttcgagtt
ttccttcgattataagaactttggcgacaaggccgccaagggcaagtgaccatcgctctttcggcagccggctgatcaactttaaaatccgataagaaccaca
attgggacaccgggaggtgtaccaacaaggagctggagaagctgctgaaggactacagcatcgatgatggccacggcgagtgcatcaaggccgccatct
gtggcgagagcgataagaagttttcccaagctgacctcgtctgaatacaatctcgagatcgccaagcgaagaccggcacagagctggactacctgatct
ccccgtggccgatgtgaacggcaactcttcgacagcagacagcccccaagaatatgcctcaggatgccgacgccaacggcgctatcacatggcctgaa
gggctgatgctgctggcagatcaagaacaatcaggagggcaagaagctgaacctgtgtcatcaagaacgaggagtactttgagttcgtgagaaccgcaac
aattga
```

>AsCas12a (codon-optimised DNA sequence)

atgacacagttcggggctttaccaacctgtatcaggtgagcaagacactgaggtttgagctgatcccacagggaagaccctgaagcacatccaggagcagg  
cttcatcggaggagacaaggccagaatgatcactacaaggagctgaagccatcatcgataggatctacaagacctatgccgaccagtgctgcagctggc  
agctggattgggagaacctgagcggcccatcactctatcgaaggagaagacagaggagaccggaaagcctgatcaggagcagggccacatafaga  
atgccatccagactacttcatcggcaggacagacaacctgaccgatgccatcaataagcggccagccgagatctacaaggcctgttcaaggccgagctgtta  
atggcaaggtgctgaagcagctgggaccgtgaccacaaccgagcagagaacgccctgctgcgagcttcgataagtttacaaccttctccggctttatga  
gaaccggaagaacgtgtcagcggcaggatcagcacagccatcccacagaatcgtgcaggacaactccccaaagtttaaggagaattgtcacatcttac  
aagactgatcaccgccgtgccagcctgaggagcactttgagaacgtgaagaagccatcggcatctcgtgagcactccatcaggagggttttcttccct  
tttataaccagctgtgacacagaccgatcagctgtacaatcagctgtgggaggaatcttagggaggcaggaaccgagaagatcaaggccctgaacga  
ggtgctgaatcgtgccatccagaagaatgatgagacagccacatcatcgcctccctgccacaccgcttcatccccctgtttaaagcagatccttccgatcgaaca  
ccctgtcttcatcctggaggagtttaagagcagcaggaagtgatccagctctcgaagtacaagacactgctgcgcaacgagaatgtctggagaccgccga  
ggccctgttcaagcagctgaacgacatcgaactgacacacatcttcatcagccacaagaagctggagaccatcagcagcgcctgtgcgaccactgggatacact  
gcggaatgccctgtacgagcggagaatctccgagctgacaggcaagatccaagcttccaaggagaaggtgcagagaacctgaacgacgagatataca  
cctgcaggagatcatctctgccgagcaaggagctgagcgggcttcaagcagaagaccagcagatctgtcccacgcacagccgctggtatcagcc  
actgcctacaacctgaagaagcaggaggagaaggagatcctgaagtctcagctggacagcctgctggcctgtaccacctgtggactggtttgccgtggatg  
agtccaacgaggtggacccgagttctctgccagctgaccggcatcaagctggagatggagccttctctgagcttctacaacaaggcccaattatgccacca  
agaagccctactccgtggagaagttcaagctgaactttcagatgcctactggcctctggctgggacgtgaataaggagaagaacaatggccatcctgtttg  
gaagaacggcctgtactatctgggcatcagccaaagcagaaggcaggtataaggccctgagcttcgagcccacagagaagacctccgagggccttgataaga  
gtactatgactacttccctgatgccccaagatgatccaaagtgcagcaccagctgaaggccgtgacagcccactttcagaccacacaacccccatcctgt  
gtccaacaatttcatcagcctctggagatcacaagagatctacgacctgaacaatcctgagaaggagccaaagaagtttcagacagcctatgccaaagac  
cggcagatcagaagggatacaggaggccctgtgcaagtggatcactcagcgggatttctgccaagtataccaagacaacctctatcagatctgtctagcctga  
ggccatcctcagataaggacctgggagctactatgccgagctgaatccctgtgtaccacatcagcttccagcgcacgagagagatcagggatg  
ccgtggagaccggcaagctgtacctgtccagatctatacaaggactttgccaaaggccaccacgcaagcctaactgcacacactgtattggaccggcctgtt  
tttccagagaacctggccaagacaagcatcaagctgaatggcaggccgagctgttctacagacctaaagcagatgaagcagatggcccacaggtgggc  
gagaagatgctgaacaagaagctgaaggatcagaagacaccaatccccgacacctgtaccaggagctgtacgactatgtgaatcaccgctgtcccacgacct  
gtctgatgagggccggccctgctgccaaactgtatccaaggaggtgtctcacgagatcacaagataggcgtttaccagcgacaagtctttttccactg  
cctatcacactgaactatcagccgccaattccccatcaagttcaaccagcgggtgaatgcctactgaaggagcaccggagaccctatcatcggcagcagc  
gggagcagagaacctgatctatcacagtgatcactccaccggcaagatcctggagcagagatctctgaataccatccagcagtttgattaccagaagaagct  
ggacaaccgggagaaggagagagtgagcagcaaggcagcggcctgtctgtgtggcacaatcaagatctgaagcagggctatctgagccaggtatccacga  
gatcgtggacctgatgatccactaccaggccgtggtgtgctggagaacctgaatftcggcttfaagcaagagaccggaatcgcagagaaggccgtgtacc  
agcagttcagaagatgctgacgataagctgaattgcctgtgtgctgaaggactatccagcagagaaagtgaggagcgtgctgaaccataccagctgacagac  
cagttcacctcctttgccaaagatgggacccagctgtgcttctctgtttacgtgctgccccatatacatcaagatcagctccctgaccggctcgtgagcccttct  
gtggaagaccatcaagaatcacgagagcagaagcacttctgagggcttcgactttctgactacgatgtgaagacaggcacttcatcctgacttfaagatg  
aaccgcaatctgtcctccagaggggactgccaggtttatgcctgcatgggatacgtgttcgagaagaacgagacacagtttgacgccaaggcaccctttcat  
cgccggcaagcgcacgtgccagtgatcagaaatcaccggttaccggccgtacagagacctgtatctccaacgagctgacgccctgtggaggagaag  
ggcatcgtgtcagagatggctccaacatcctgcaaaagctgctggagaatgacgattctcacgccatcgcacaatggtggccctgatcagaagcgtgctgcag  
atgaggaaatcfaatgccccaagcggagactatatacaagccccgtgagagatcgaatggcgtgtgcttgcactccaggtttcagaaccagagtgccct  
atggagccgatccaatggcgcctaccacatcgcctgaaggccagctgctgtaatcacctgaaggagagcaaggatcgaagctgcagaacggcatct  
ccaatcaggactggctggcctacatccaggagctgaggaactag

>LbCas12a (codon-optimised DNA sequence)

atgctgaagaacgtgggcatcagacactgagctggtggagaaggcagaagaacatgagcaagctggagaagttcacaactgctacagcctgagcaagacc  
ctgagatfcaaggccatccccgtgggaaaaaccaggagaacatcagacaagaagactgctggtggaggacgaaaagagagccgaggactacaaggcgt



gaagaagctgctggacagatacctgagcttcatcaacgacgtgctgcacagcatcaagctgaagaacctgaacaactacatcagcctgttcagaagaagac  
cagaaccgagaaggagaacaaggagctggagaacctggagatcaacctgagaaggagatcgccaaggccttaagggaacgagggttacaagagcctgt  
tcaagaaggacatcatcgagaccatcctgccgagttctggatgacaaggacgagatcgccctggtgaacagcttcaacggcttaccaccgcttaccggctt  
cttcgacaacagagagaacatgttcagcgaggaggccaagtctacaagcatcgcttcagatgcatcaacgagaacctgaccagatacatcagcaacatggacat  
cttcgagaagggtggacgccatcttcgacaagcacgaggtgcaaggagatcaaggagaagatcctgaacagcgactacgacgtggaggacttcttcgagggcgag  
ttctcaactcgtgctgaccaggaaggcatcgactgtacaacgccatcatcgccggatttggacagagagcggcgagaaaatcaaggcctgaacgagtac  
ataacctgtacaaccagaagaccaagcagaagctgcccaagttcaagccctgtacaagcaggtgctgagcgacagagagacctgagcttctatggcgagg  
gctacaccagcgatgaagaggtgctggaggtgttcagaaacacctgaacaagaacagcgagatcttcagcagatcaagaagctggagaagctgttcaagaa  
cttcgacgagtagcagcggccgcatcttggtaaaacggccccgctatcagcacaatcagaaggacatcttcggcgagtggaacgtgatcagagacaagt  
ggaacgccgagtagcagcagatccacctgaagaagaaggccgtggtgaccgagaatacagggacgacagaaagaaagagcttcaagaagatcgccagcttc  
agcctggaacagctgcaagagtagcgtgacgctgacgtgagctgtggagaagctgaaggagatcatcatccagaaggtggacgagatctacaaggtgtagc  
gcagcagcgagaacttttcgacgccgacttctgcttgagaagagcctgaagaagaacgatccgctggtggccatcatgaaggacgtgctggacagcgtgaag  
agcttcgagaactacatcaaggccttcttcggcgaaggcaaggagaccaacagagacgagagcttctacggcgacttctgctggcttacgacatcctgctgaag  
gtggaccacatctacgacgccatcagaactacgtgaccagaagccctacagcaaggacaagttcaagctgtacttccagaacccccgcttggcgagtg  
gacaaggataaggagaccgactacagaccacatcctgagatacggcagcaagttactcctggccatcatggacaagaagtagccaagtgctgcagaaga  
tcgacaaggacgagtgaaaggcaactacgagaagatcaactacaagctgctgccggcctaataaaatgctgcccaagggtgttcttcagcaagaagtgatg  
gcctactacaacccccgagggacatccagaagatcacaagaacggcaccctcaagaaggcgacatgttcaacctgaacgactgccacaagctgacgactt  
cttcaaggacagcatcagcagatacccaagtggaagcaacgcctacgacttcaactcagcgagaccgagaagtacaaggacatcgccggcttctacagagaag  
tgaggagcaggggatacaaggtgagcttcgagagcgccagcaagaaggaggtggacaagctggtggaaggaggcaagctgtacatgttcagatctacaaca  
aggacttcagcgacaaggtctacggaacccccaatctgcacacctgacttcaagctgctgttcgacgagaacaaccagccagatcagacttctggagggc  
ctgaactgttcatgagaagccagcctgaagaaggagagctggtggtgcatcctgccaatagccccatcgtaacaagaaccccacaacccaagaaaac  
caccacctgagctacgactgttacaaggacaagagattcagcgaggaccagtagctgcatatccccatcgccatcaacaagtgcccccaagaacatcttca  
agatcaaacaccgaggtgagagtgctgctgaagcacgacgacaacccctacgtgacggcattgacagagcgagagaaacctgctgtacatcgtggtggtgga  
cggcaagggaacatcgtggagcagtagcctgaacgagatcatcaacaactcaacggcatcagaatcaagaccgactaccacagcctgctggacaagaag  
gagaaggagagattcaggccagacagaactggaccagcatcgagaactcaaggagctgaaggccggctacattagccagggtggtgcacaagatctcgag  
ctggtggagaagtacgatccgctgacgctctgagggatctgaacagcgcttcaagaacagcagagtgaaaggtggagaagcaggtgtaccagaagttcgaga  
agatgctgacgacaagctgaactacatggtggacaagaagcaacccctgtgctacagcgagctctgaagggataccagatccaacaagttcgagag  
cttcaagagcatgagcaccagaacggcttctatcttctacatccccgcctggtgacatctaagatcgaccctagcaccggcttctgtaacctgctgaagaccaagt  
acaccagcatcgccgacagcaagaagttcatcagcagcttcgacagaatcatgtacgtgccgaggagacctgtttgaattggcctggactacaagaactcag  
cagaaccgacgccgactacatcaagaagtggaagctgtacgctacggcaacagaatcagaatcttcagaaacccaagaagaacaacgttctgactgggag  
gaggtgtgctgacaagcgctacaaggagctgttcaacaagtagcgcatcaactaccagcaggcgacattagaccctgctgtgcaacagagcgacaagg  
ccttctacagcagcttcatggccctgatgagcctgatgctgcagatgagaacagcatcaccggcagaaccgacgtgacttcttaccagccccgtgaaaaaca  
gagcagggcatcttctacgacagcagaaactacgagggccaggaatgctatcctgccccagaatgccgatgctaaccggcgttacaacatcgccagaagggtg  
ctttggccatcgccagtttaagaaggccgaggacgagaagctggacaagggtgaagatcgccatcagcaacaaggagtggtggagtagctcagaccagcg  
tgaaacctga

>Lb5Cas12a (codon-optimised DNA sequence)

atggagaactactacgacagcctgaccagacaataccccgtgaccaagaccatcagacaggagctgaagcccgtgggaaaaacctggagaacatcaagaac  
gccgagatcatcaggccgacaagcagaagaaggagccctacgtgaagggtgaaggagctgatggacgagttccacaagagcatatcagagaagcctggt  
gggcattaaactggacggcctgagcgaatttgagaagctgtacaagatcaagaccaagaccgacgaggacaagaacagaatcagcagctgttctactacatga  
gaaagcagatcgccgacgccctgaagaacagcagagactacggctacgtggacaacaaggacctgacgagaagatcctgccgagagagtgaaaggacgag  
aacagcctgaacgccctgagctgcttcaaggcttaccaccttaccgactactacaagaacaggaagaacatctacagcgacgaggagaagcatagcagc

cggggctacagatgcatcaacgagaacctgctgatctcatgagcaacatcgagggtaccagatctacaagaaggccaacatcaagaacgacaactacgacg  
aggagacctggacaagaccttcatgatcgagagcttcaacgagtgacctgacccaaagcggcgtggaggcttacaatagcgtggggccagcattaagacagcc  
accaacctgtacatccagaagaacaagaaggaggagaactctgtgagagtgcccaagatgaagggtgctgttcaagcagatcctgagcgacagaaccagcctttc  
gacggcctgatcatcgaagcgacgacgagctgctggataagctgtgcagcttcagcgtgaggtggacaagttcctgcccataacatcgacagatacatcaag  
acctgatggacagcaataacggcaccggcatctacgtgaagaacgacagcagcctgaccacctgagcaactacctgaccgacagctggagcagcatcaga  
aacgcttcaacgagaactacgacccaagtacaccggcaagggtgaacgacaagtacgagagagaagagagaaggcctacaagagcaacgacagcttca  
gctgaactacatccagaacctgctgggcatcaacgtgatcgacaagtacatcgagagaatcaacttcgacatcaaggagatctgcgagcctacaaggagatgac  
caagaactgcttcgagggaccacgacaagaccaagaagctgcagaagaacatcaaggcctggccagatcaagagctacctggacagcctgaagaacatcga  
gagagacatcaagctgctgaacggcagcaggactggagagcagaaacgagttcttaccggcagcagagcacaagtctggaggagataccaagggtggacga  
gctgtacaacatcaccagaaactacctgaccaagaagccttcagcaccgagaagatgaagctgaacttcaacaacccccagctgctggggagatgggacgtga  
acaaggagagagactgctacggcgtgatcctgatcaaggacaacaactactacctgggcatcatggacaagagcgccaacaagagcttctgaacatcaagg  
gagcaagaacgagaacgctacaagaaggtaactgcaagctgctcccggaccaataagatgtcccaagggttcttcccaagagcaacatcgactact  
acgacccaccacgagatcaagaagctgtacgacaaggcacttcaagaaggcaacagcttcaacctggaggactgccacaagctgatcgacttctaca  
ggagagcatcaagaagaacgacgactggaagaactcaacttcaacttcagcagaccaaggactacgaggacatcagcggcttctcagagaagtgaggcc  
cagaactacaagatcacctacccaacgtgagctgcgacttcatcgagagcctggtgatgaggcaagctgtacctgttcagatctacaacaaggacttcagc  
gagtacgctaccggcaacctgaatctgcacacctgtacctgaagatgctgttcgacgagagaacctgaaggacctgtgcatcaagatgaacggcgaggccga  
ggtgtttatagaccggccagcttctgagatgagacaagggtggtgcacaaggccaaccagaagatcaccaacaagaacccaacaagcaagaagaaggagag  
catcttcagctacgacatcgtgaaggacaagagatacaccgtggacaagttcttcatccacctgccatcacctgaactacaaggagcagaacgtgagcagattc  
aacgactacatcagagagatcctgaagaagagcaagaacatcagagtgatcggcaccgacagagagcaaacctgctgacgtgggtggtgctgcatagcg  
atggcagcatcctgtaccagagaagcatcaacgagatcgtgagcggcagccaaaaaccgactaccacaagctgctggacaacaaggagaaggagagactga  
gcagcagaagagactggaagaccatcgagaacatcaaggacctgaaggccggctacatgagccaagtggtgaacgagatctacaacctgatcctgaagtaca  
cgccatcgtggtgctggaggacctgaacatcggttcaagaacggcagaaagaagggtggagaagcaggtgtaccagaacttcgagaaggccctgatcgaca  
gctgaactacctgtgatcgacaagaccagagagcagctgtctcttctagccctggaggagtgctgaacgcctatcagctgaccgctaaagttcgagagcttcgag  
aagatcggcaagcagaccggctgcatctctatgtgcccgcctacctgacatctcagattgacccacaaccggcttctgacacctgttctaccagaaggacacca  
gcaaacaggcctgcagctgttcttcagaagttcaagaagatcaacttcacaaggtggccagcaacttcgagttcgtgttcgactacaacgacttccaaca  
ggccgaggccacaaaaccaactggaccatcagcaccaggaaccagaatcccaagtacagaagcagatgacccaacggcaagtgatcagcagaacc  
gttcacccaccgacattatcaaggaggcctgaacagagagaagatcaactacaacgacggccacgacctgatcagatcgtgagcagcagagaagcgc  
ccgtgctgaaggagatctactacggcttcaagctgacctgcagctgagaatagcaccctggccaatgaaggaggagcaggaggactacatcatcagccccgtg  
aagaacagcagcggcaactacttcagacgagaatcaccagcaaggagctgcccctgtgatgctgatgtaacggcctacaacatcgcagaaagggactgt  
gggcccctggaacagatcagaacagcagagaactgagcaaggtgaagctggccatcagcaacaaggagtggttcgagtagaccagaacaacatccccagcc  
tgtga

>HkCas12a (codon-optimised DNA sequence)

atgttcgagaagctgagcaacatcgtgagcatcagcaagaccatcagattcaagctgatccccgtgggcaaacctggagaacatcagagaagctgggcaagct  
ggagaaggacttcgagagaagcgacttctacccatcctgaagaacatcagcagcactactacagacagtacatcaaggagaagctgagcgacctgaacctg  
gactggcagaagctgtacgatgccacgagctgctggatagcagcaagaaggagagccagaagaacctggagatgatccaggccagatcagaaaagggtgctg  
ttcaacatcctgagcggcgagctggataaaagcggcgagaagaacgcaaggacctgatcaagaacaacaaggccctgtacggcaagctgttcaagaagcag  
tcatcctggaggtgctgcccgacttctgtaacaacaacgacagctacagcagggaggacctggaaggactgaacctgtacagcaagttcaccaccagactgaag  
aactctgggagaccagaagaacgtgttaccggacaaggacatcgtgaccgccatfccccttcagagccgtgaacgagaacttcggcttactacgacaacatca  
agatcttcaacaagaacatcagtagcttggagaacaagatccccaacctggagaacgaactgaaggaggccgatactctggacgacaacagaaagcgtgaagga  
ctacttcccccaacggcttcaactacgtgatccccaggacggcctcgtgtaccaggccatcagaggcggattccaaggagaacggcgaaaaggtgc  
agggcatcaacgagatcctgaacctgaccagcagcagctgagaagaaagcccagaccaagaacgttaagctgggcgtgctgaccaagctgagaagcag

atcctggagtacagcgagagcaccagctcctgatcgaccagatcgaggacgacaacgacctggtggacagaatcaacaagttcaactgagcttctcgagag  
cacagagggttagccccagcctgtttgagcagatcgagagactgtacaacgcccgaagagcatcaagaaggaggaggtgtacatcgacgccagaaaccccag  
aagttcagccagatgctgttcggacagtgaggacgtgatcagaaggctacacctgaagattaccgagggcagcaaggaggagaagaaggtacaaggag  
tacctggagctggacgagacaagcaagccaaagatacctgaacatcagagagatcgaggagctggtgaaccttggagggttcgaagaggtggacgtgt  
tcagcgtgctgctggagaagttcaagatgaacaacatcgagagaagcaggttcgagggcccctatctacggaagccctatcaagctggaggccatcaaggagtac  
ctggagaagcactggaggagtaccacaagtggaagctgctgctgatcggaacgacgatctggataccgacgagaccttacccccctgctgaacgaggtgat  
cagcgactactacatcatccccctgtacaacctgaccagaacctgaccagaaaagcagcgcacaaggacaagatcaaggtgaactcgaactcctccacact  
ggctgacggatggagcgaagcaagatcagcgacaacagaagcatcatcctgagaaaaggcggctactactacctgggcatcctgatcgacaacaagctgctg  
atcaacaagaagaacaagcaagaagatctacgagatcctgatctacaaccagatccccgagttcagcaagagcatccccactaccctccaccaagaaggt  
gaaggagcacttcaagaacaagctgagcgaactcagctgatcgacggatgtgagccccctgatcatcaccaggagatctacgacatcaagaaggagaaga  
agtacaagaaggacttctacaaggacaacaaccaacaagaactacctgtacaccatctacaagtgatcgagttctcaagcagttcctgtacaagtacaaggg  
ccccacaaggagagctacaaggagatgtacgactcagcacctgaaggacaccagcctgtacgtgaacctgaacgacttctacgccgactgaaacagctgtg  
cctacagagtgctgttcaacaagatcgacgagaacaccatcgacaacgccgtggaggatggaagctgctgttccagatctacaacaaggacttcagccccg  
agagcaaggcgaagaagacctgcacacctgtactggctgagcatgttcagcagggagaacctgagaaccagaaagctgaagctgaacggccaggccgag  
atctctacagaaaagctggagaagaagccatcatccacaaggaggcagcatcctgctgaacaagatcgacaaggaggcacaacaccatccccgagaac  
atctaccagagtgctacagatacctgaacaagaagatcgccagagaggacctgagcgcagaaagctatcgccctgttcaacaaggacgtgctgaagtacaagga  
ggccagattcagatcatcaaggacagaagatacagcgagagccagttcttctccacgtgccatcacttcaactggacatcaagaccaacaagaacgtgaa  
ccagatcgtcagggcatgatcaaggacggcgagatcaagcacatcctggatcgacagagcgaagacacctgctgtactacagcgtgatcgacctggag  
ggcaacatcgttgaacaggcagcctgaacacactggagcagaacagattcacaacagcaccgtgaaggtggactaccagaacaagctgagaaccagagag  
gaggacagagacagccagaagaactggaccaatcaacaagatcaaggagctgaaggacggctatctgagccacgtggtgcacaagctgagcagact  
gatcatcaagtacgagccatcgtgatctggagaacctgaaccaggcctcaagagaggcagattcaaggtggagagacaggtgtaccagaagttcagctgg  
ccctgatgaacaaactgagcggcctgagcttcaaggagaagtacgacgagagaaaagacctggagcccagcggaaatcctgaatccatccaggcctgttatccc  
gtggacgcttcaagaactgcaggagcagaacggcatcgtgttctatctcccggcgttacacaagcgtgattgacccctgacggctttaccaacctgttca  
gactgaagagcatcaacagcagcaagctacgaggagttcatcaagaagttcaagaacatctacttcgacaacgaggaggaggacttcaagttcatcttaactaaa  
ggacttcgccaagccaacctggtgatcctgaacaacatcaagagcaaggactggaagatcagcaccagaggcgagagaatcagctacaacagcaagaagaa  
ggagtacttctactgtagccccaggtcctgatcaacaagctgaaggagctgaacatcgactacgagaacatcgatcatccccctgatcgacaacctgga  
ggagaaggccaagagaaagatcctgaaggcctgttcgacacctcaagtagcgtgagctgagaaactacgacttcgagaacgactacatcatcagcccca  
ccgccgatgataacggcaactactacaacagcaacgagatcgacatcgacaagaccaactgcccacaacggagatgctaaccggcgccttaacatcgtgag  
aaaggcctgctgctgaaggacagaatcgtgaacagcaacgagagcaaggtggacctgaagatcaagaacgaggactggatcaactcatcatcagctga

>OsCas12a (codon-optimised DNA sequence)

atggagaccgagatcctgaagtacgacttctcgagagagagggcaagatcatgtactacgacggcctgaccaacaatacggcctgagcaagaccatcagaaa  
cgagctggtgcccacggaaaaacctggacaacatcaagaagaacagaatcctggaggccgacatcaagagaaaagcgaactacgacacgtgaagaagct  
gatggacatgtaccacaagaagatcatcaacgaggccctggacaactcaagctgagcgtgctggaagatgccgccgacatctacttcaacaagcagaacgacg  
agagagacatcgacgcttctgaagatccaggacaagctgagaaaggagatcgtggagcagctgaaggacacaccgactacgcaaggtgggcaacaag  
gacttctggcctgctgaaagctgctagcaccgagggaagacagaatcctgatcgagagcttcgacaacttctacacctactcaccagctacaacaaggtgagaa  
gcaacctgtacagcggaggataagagcagcaccgtggcctacagactgatcaacgagaacctgcccagttctcgacaacatcaaggcctacagaacctgtg  
agaaacgccggagtgatcagcggagacatgagcatcgtggagcaggacgagctgtttgaggtggacacctcaaccacacctgaccagatggatcgaca  
cctacaaccatgatcggccagctgaacagcgccatcaacctgtacaaccagaagatgcatggcggcagcttfaaaagctgcccagatgaaggagctg  
tacaagcagctgctgaccgagagagaggaggaggtcatcgaggagtacaccgacgacgaggtgctgattaccagcgtgcacaactactgagctactctgatcg  
actacctgaacagcagaaggtggagagcttctcgacacctgagaaaagcagcggcaaggaggtgtcatcaagaacgacgtgagcaagaccacctgatg  
caacatcctgttcgacaactggagcaccatcgacgacctgatcaaccagagtagcagcgcctccgagaacgtgaagaagccaaggacgacaagctactc

gagaagagacagaaggacctgaagaagaacaagactacagcctgagcaagatcggcctctgtgcagagataccaccatcctggagaagatcatcagaaga  
ctggtggacgacatcgagaagatctaccagcaacaacgtgttcagcgacatcgtgctgagcaagcagcagacaagaagctgagcaagaacaccaatg  
ccgtgcaggccatcaagaacatgctggacagcatcaaggactcgaagcagcagctgctgattaacggcagcggccaggagatcaagaagaacctgaactg  
gtacagcgaacaagaagccctggccggaacttagacaggtggaccacatctacaacctgaccagaaactacctgaccaagaagccctcagcaccgagaag  
atcaagctgaactcaacagaccacctctggtatggctgggacaagaataaggaggagccaacctgggaatcctgctgatcaaggacaacagatactacct  
ggcatcatgaacaccagcagcaacaagccctcgtgaacccccctaggccatcagcaacgacatctacaagaaggtggactacaagtactccccgccccaa  
taagatgctgcccagggtgttctccaccaagaacatcgttactacgccccagcgaagaactgctgagcaagtacagaaaggcaccacaagaaggga  
gacagctcagcatcgacactgcagaacctgatcgactctcaagagcagcatcaacaagaacaccgactggagcactctggcttcaactcagcgcacc  
aacagctacaacgacatcagcactctacagagaggtggagaagcaggctacaagctgagcttaccgacatcgacgctgctacatcaaggacctggtgga  
caacaacgagctgtacctgtccagatctacaacaaggactcagcccctacagcaaggcgaagctgaacctgcacacctgtactcaagatgctgttcgaccag  
agaacctggacaacgtggtgtacaagctgaacggagagggcagggtgttatagccccgagcatcgaatctgacgagcagatcatccacaagagcggcc  
agaactcaagaacaagaaccagaagagaagcaactgcaagaagaccgacctcactacgacatcgtgaaggacagaagatactgcaaggacaagttcat  
gctgcacctgcccacagtgaaactcggcacaacgagagcggcaagttcaacgagctggtgaacaacgccatcagagccgacaaggagctgaactgtatc  
ggcatcgacagagggcagagaacctgctgtacgtggtggtggatccctgtggcaagatcagcagcagatcagcctgaacacctctggacaaggagt  
acgacatcgagaccgactaccagctgctggacgaaaaggaggcagcagagacaaggccagaagggactggaacacctcagaacatcaaggagct  
gaaggaggctatctgaccaggtggtgaacatcatcgcaagctggtgctgaagtacgacccatcatctgctggaggacctgaactcggctcaagagag  
gcagacagaaggtggagaagcaggtgtaccagaagttcagaagatgctgatcagaagatgaactacctggtgctggacaagagcagaagcaggagagcc  
ctcaaaaacctggaggagccctgaatgcctgcaactgacaagcgcctcaagagcttcaaggagctgggaaagcagaccggcatcatctattacgtgcccgcct  
acctgaccagcaagatcgatctaccaccgctcgcgaacctgttctacatcaagtacgagagcgtggacaaggccagagactcttcaagagttcacttcatc  
agatacaaccagatggacaactactcagttcggctcactacaagagcttaccgagagagccagcggctgtaagagcaagtggatcgcctgtaccaacgg  
cgagagaatcgtgaagtacagaacaagcagcaagaacaacagctcagcagaagaccgtgatcctgaccgacgagtagaagcctgttcgacaagtacctg  
cagaactacatcgacgaggacgactgaaggaccagatcctgcagattgacagcggcactctacaagaacctgatcaagctgttccagctgacctgcagatg  
agaacacagcagcagcggcaagagagactacatcatcagccccgtgaagaactacagagaggagttctctcagcaggttcagcagatgaccttcccc  
gagagctgatgtaacggcgcctacaacatcgtagaaggcctgtgggtgatcaagcagatcagagagaccaagagcggcaccagaatcaacctggccat  
gagcaactctgagtggtggagtatgccagtgcaacctgttatga

>TsCas12a (codon-optimised DNA sequence)

atgaccaagacctcagacgcgagtcttcaacctgtacagcctgcagaagaccgtgagattcagctgaaacccgtgggagaacagctagcttcgtggaggac  
ttcaagaacgaggccctgaagagagtggtgagcaggacgaaagaagagccgtggactaccagaaggtgaaggagatcagcactaccacagagacttc  
atcagggagagcctgaactactccccgagcaggtgagcaaacgctctggagcaggccttccacctgtaccagaagctgaaggccgctaaggtggaggaaa  
gagagaaggccctgaaggatgggaagccctgcagaagaagctgagagagaaggtggtgaaagtctcagcagcagaacaagccagattcagcagaatc  
gacaagaaggagctgatcaaggaggacctgatcaactggctggtggccagaatagagagcagacatccctaccgtggagaccttcaacaactcaccaccta  
cttaccggctccacgagaacagaagaacatctacagcaaggacgaccacgctaccgccatcagctcagactgatccacgagaacctgcccagttcttga  
caactgacagcttcaacaagctgaaggaggcttccccgagctgaagttcagaaggtgaaaggaggacctggaggtggactacgatctgaagcagccttcg  
agatcagtagtacttctgaactcgtgaccagggccggaatcaccagtaactacctgctgggcggcaaacactggaggatggcacaagaagcagggcat  
gaacgagcagatcaacctgttcaagcagcagcagaccagagacaaggccagacagatccccaaactgatccccctgttcaagcagatcctgagcagagaacc  
gagagccagagcttaccacaagcagttcagagagcagcagagctggttgcagcctgcagaagctgcacaacaactgccagacaagttcaccgtgctgca  
gcaggctattctgggactggctgaggctgatctgaagaaggtgttcatcaagaccagcagctgaacgctctgagcaaacacctcttcggcaactacagcgtgtt  
agcgagccctgaacctgtacaaggagagcctgaagaccaagaagcccaggaggcctcgaaaaactgcccgccatagatccatgacctgatccagttacc  
tggagcagttcaacagcagcctggagcgtgaaagcagcagagcagacaccgtgctgaactacttcaagaccgacgagctgtacagcagattcatcaag  
agcaccagcagggcttccccaagtgaacccctgtttagctggaagccctgagcagcaaaagaagacccccgagagcgaagatgaaggcgttaaggc  
caagaaggctcagcagatcaagaatcaaggcctacctggacacacttatggaggccgtgactttgtaagccctgtatctggtgaaggcagaagaatg

atcgaggcctggacaaggaccagagcttctacgagccttcgagatggcctaccaggaactggagagcctgatcatccccatctacaacaagccagaagcta  
cctgagcagaagccctcaaggccgacaagtcaagatcaacttcgacaacaacacctgctgctggatgggacgccaacaaggaaacagccaacgccagc  
atcctgttaagaaaggagcctgtactaccttgcatcatgccaagggaagaccttctgttcgactacttctgagcagcgaggacagcgagaagctgaag  
cagagaagacagaagaccgccgaggagcttctgctcaagacggcgaagctacttcgagaagatcagatacaagctgctgcccggcgctagcaaatgctgc  
ccaaggtgttctcagcaacaagaacatcggcttctacaacccagcgacgacatcctgagaatcagaacaccgccagccacacaaaatggcaccctcagc  
aaggacatagcaaggtggagtcaacctgaacgactgccacaagatgacttctcaagagcagatccaagaacccccgaatggggaagcttcggctt  
cacattcagcgacaccagcgacttcgaagacatgagcgccttctacagaggtggagaaccagggctacgtgatcagcttcgacaagatcaaggagactaca  
tcagagccaggtggagcagggaacctgtacctgtccagatctacaacaaggacttcagcccctactctaaaggcaagcccaatctgcacacctgtactgga  
aggccctgttcgaagagcccaacctgaataactgggtggccaagctgaatggcgaagccgagatcttctcagaagacacagcatcaaggccagcgacaaggt  
ggtgcaccctgccaatcaagccatcgacaacaagaacccccacaccgagaaaaccagagcacttcgagtacgacctggtgaaggacaagagatacacca  
ggacaagtcttctccactgcccacagcctgaacttaaggcccaggcgtgagcaagttcaacgacaaggtgaacggcttctgaagggaaccccagct  
gaacatcatcggcatcgacagagcgaagacacctgctgtacttaccctgggtgaaccagaaggcgagatcctgtgcaggagagcctgaacacctgatga  
gcgacaagggccactgtaacgactaccagcagaagctggacaagaaggagcagaaagagacgccgcaaaaatctggaccacctggagaacatcaa  
ggagctgaaggagggtatctgagccactggtgataagctggcccactgatcatcaagtaaacgccatcgtgtgctggaggacctgaacttcggctcaa  
gagaggcagattcaaggtggagaagcaggtgtaccagaagttcgagaaggccctgatcagaagctgaactacctggttcaaggagaaggagctggcgca  
agtgggacattatctgaccgctaccaactgacagctcccttcgagagcttcaagaagctgggcaagcagagcggcatcctgtttacgtgcccgctgactacac  
tctaagatgacccccacaaccggcttctgaacttctggacttgatatacagagcgtggagaaggctaaagcagctgctgagcacttcaacgccatcagattc  
aacagcgtgagaactacttcgagttcgatcactacaagaagctgacccccaaagaaaagtgggcaccagagcaaatgggtgatctgcacctacggcg  
acgtgagataccagaacagaagaaccagaaggccactgggaaccgaagaggtgaacgtgaccgagaagctgaaggctctgttcgccagcgacagcaag  
acaaccacctgatcactacccaacgacgacaacctgatcagctgatcctggagcaagacaaggccagcttctcaaggagctgctgtgctgctgaagct  
gacctgacctgagacacagcaagatcaagagcaggagcacttattctgagccccgtgaagaatgagcaggggcagttctacgacagcagaaggccgg  
agaagtggtgcccacaagatgccgatgtaacggagcctaccatctgctgaaggcctgtggaacctgcagcagatcaaccagtgaggagaaggccaagaca  
ctgaacctggccatcaagaaccagactggttcagcttcatccaggagaagccctaccaggaatga

>BbCas12a (codon-optimised DNA sequence)

atgaagaagttaccaacctgtaccctgtcagaagaccctgagatcagacttacccccaggcaataccttaagcacctgtgcaagatcatccaggaggac  
gagcagatcgtgagatagccaggaggtgaagaagctgctggacagataccacaaggatcaccgcatcgcctgagcagcttctacaagccccctggc  
caaagagatcatccccagctgaaggagttcggcagatcagagctacagcggcagcgaagcagatcagccatccaggacgagctgagagagcttgggtg  
aagggtcttaaggagagggcgagcagagagagaagatacaagatcctgatcggcgttaaggcaaccctaatgctgacgagctgttcaacaccgagctgatca  
acttctgaaggacctgctgaacaggctctggtgaagaagttccagaagcacaccggctacttctggcttcaacgagaacagaagaacatgtacagcgcca  
aggctcagagcagaccattgctacagactgatccacgagaacctgccagattcctggacaacatcaccacctacgagaaggtgaagacctacctgaaggag  
gagatccccagctggagaaggactggtgagagccggagcttctggttagccatgtggacagcgtgttcaccatcacttctcctggagggtttacccaaa  
gggcatcgaccaataaacgccctgatcggcaagatcgtgaaccaagagcaggcggaggtgaaaggcctgaacgagagaaatcaacctgtacaaccagcagc  
acaagcaggaggctaaagctgcctctgttcaagccccgtacaagcagatcctgagcgacagagagcaacttagctggctggcgaagcttacaacagcgacaag  
gacctgctggacagcatccagaagtactaccagctgctgacgacaaccagatcttcgagagaatccccagactgatgcacacactggagaagccccctgga  
caagatctggatcacctacgacaccagctgaccagatcagcaacacctgtacggcagctggagagtgattggagaggccctgggcagaaatgccaagagc  
gagaaggagagaagaagcagccagaagaaggccctgaactacagcctggagagcatcaatcagccatcgccaagatgccagcgatgaggaaacttctccc  
atcagaagcttctatcgcctgggaagcaacccccagcaagaagacgctagcagcggcactggtggataaggtgagaagcagctacaaggcctgccag  
gacatccttacaacctgaccataaccggcaagaagctgatccaggacaagaagcaggtggacctgctgaaacagctgctggacgaccttctgatctgcagag  
attcatcaagccccctgctgtacagcaacaacgagaacgagaccacaaggagaggtgttctacaccgagctgaccgacatcatggacctgctgaacctatcgt  
gggctgtacaacaaggtgagaactactgacctcagaaagccctacagcaccgagaagttcaagatcaactcaagagcagcagctgctgctggatgggac  
agaacaaggagaaggacaacctggcgtgatcctgaagagagaggacaagtactacctggccatcatggacaaggctcacaacgccaccttcaagaacaag

agcctgccacacaaggagagtgtctacgagaagatggagtacaagctgctgcccggcgccaataaaatgctgccaaaggtgtacatcaccagcaagaagggc  
atcgagagcttccatcccagcgaagagctgcagaagaagfacaagctgggcccacacaagaaaggagccagcttcaacctgagcgacatgagagccctgatc  
gactactcaaggagagcctggagaagcatgaggagcacagccaattcggcttccacttcagcgacaccagcacctacgaagacatcagcggcttctacagaga  
ggttgagcagcaggcctacaagatcaccttcagaaaaggtgagcgtggagfacatcgaccagctggtgaacgagggcaagctgtacctgtccagatctacaaca  
aggacttcagcccctacagcaagggcacccctaactgcacacccctgtactggaagatgctgttcgaccccgaatctgcaggacatcgtgtacaagctgaacg  
gagaagccgaggtgttcttcagaaaagagcctgcagtagcacagaccacacacccctaaggccaacccatcaacaagaagcctgctgaacgaaggag  
agaccagcctgttactacgacctgatcaaggacagaagattcaccgtggacaagttccagttccacgtgccatcacatgaactcaaggccaccagggca  
ccaaagtgaaccagatggtgcaggagaggtgaagaagagcaagggcttcacctgatcggaatcgacagaggcgagagaaacctgctgtacatcgtggtgat  
caacgagagagcggagatcagcagctgacgctgaacaagatgtaaacctaccaggagaaggagcacaccctggactataaggccctgctggagaa  
gagaagccagagcagactggaggagagaaaagagctggcagaccatcgagaacatcaaggagctgaagggcggctacctgtctcaagtggtgcacaaaatcg  
cccagctgatgatcaagtacaacgccatcgccgtgctggaggatgtaacttcgcttcatcagaaccagaagaagttcgagttcagcgtgtaccaggagttcga  
gaagaagctgatcgacaagctgggctactgtggtggataaaaagccccatccaacaagaaggagactgctgcaggcttataactgacagccccctcaaga  
gcttcagagagatgggcaagcagaacggcttctgttctatgtcccgcctggaataccttgcctacgacctagaacaggcttctgtaacctgctggacaccag  
atacgagagcctcgaagaccaaggagctgatcaagaagctgaaggacatcagatacaacagccagaaggactggttcgagatcgacctggactacaacgcc  
ttcgcaacagagctaaaggcagcagaagcaagtgagactgtgcagctacggcgagagaatcgagcacaccagaaagcaggacagcaacggccagggaag  
aaagcgacagcatggtgttctgaccgagccctcaagagctgttcaccaagtaccagatcgactacagagagaacctgaaggagcagctgctgctgcaaaagc  
gacaagcccttctctgagacttctgagcctgctgagactgacctgcagctgagaacaagcctgagcaaacgctgatcgactacatcctgagccccgtggct  
gatgaaaacggcaggttcttcagacagcagaagccctgagcaacgaacctcaagatgccgacccaacggagcttatcacatcgccctgaaaggactgtggg  
tgctggacaagatcagaagaccgagaagtgaccctgccaactggtctgagcaaccagggaatggctgagcttcgctcaggagaaagcccttctcaacgag  
tga

>BoCas12a (codon-optimised DNA sequence)

atgaggaaagtcaacgagttcgtggcctgtaccccattagcaagaccctgagattcgagctgaagcccatcggcaaaacctggagcaccatccagagaacaa  
gctgctggagcacgatgctgtgagagctgacgattacgtgaaggtgaagaagatcagcaagctaccacaagtcctgatcgatgaggtctgagcggcttcac  
atftgacacagaggccgacggcagaagcaataacagcctgagcagactacctgactacaacctgaagaagagaacgagcaggagcagaagacccttcaag  
accatccagaacaacctgagaagcagatcgtgaacaagctgaccagagcagagaatcagaagaatcgacaagaaggagctgatcaccaccgatctgcc  
gacttctgacaaacgagagcagagaaggagctggtggagaagttcaagaactcaccaccttaccaggtccacaagaacagaaagaacatgtacagca  
ggaggagaaagcaccgccctgccttcagactgatcaacgagaacctgccaaagttcgtgataacatcgccgccttcgagaagttgtgagcagccccctgg  
ccgaaaaaatcaacgccctgtacgaggactcaaggagctaacgtggaggagatcagcagaggttcagactggactactacgagcagctgctgacccag  
aagcagatcgacctgtacaacgccatgtggggcagacaaccgaaggagacaacaagatccagatcaagggcctgaaccgtacatcaacgagfacaaccag  
cagcagaccgacagaagaacagactgccaaagctgaagccccgtacaagcagatcctgagcgacagagagagcgttagctgctgccccctaaattcgaca  
cgacaagaacctgctgatcaagatcaaggagtgctacgacgcccttagcgagaaggagaaggtgttcgacaagctggagagcaccctgaagagcctgagcac  
ctacgacctgagcaagatctacatcagcaacgacagccagctgagctacatcagccagaagatgttcggcagatgggacatcatcagcaagccatcagagag  
gactgcgcaagagaacccccagaagagcagagagagcctggagaagttcgccgagagaatcgacaagaagctgaagaccatcgacagatcagcagctgg  
cgactggacgaatgtcttctcagctggcgaaacctacgtgaagagagtgaggactacttctgtgctatggcgagagcgaattgacgacgagcagacc  
gataccaccagcttcaagaagaacatcagggcgcctacgaatctgtgaaggagctgctgaacaacgccgacaacatcaccgacaacaacctgatgcaggaca  
agggcaacgtggagaagatcaagacctgctggacgccatfaaggacctgcagagattcatcaagccccctgctgggcaaaaggagatgagccgataaagacg  
gcgtgttctacggcgaattaccagcctgtggaccaactggaccaagtgacccccctgtacaacatggtgagaactacctgaccagcaagccctacagcaca  
agaagatcaagctgaacttcgagaacagcacctgatggatggtggacctgaacaaagagcccgacaacaccaccgtgatcttctgcaaggcggcctgtac  
taccttggcatcatgggcaagaagtacaacagagttcgtggacagagaggtatgcctcagcagagagtgctacgacaagatggagtacaagctgttccc  
ggcgcaataaaatgctgccaaaggtgttcttagcgagaccggcatcacaagattcctgccagcgaagaactgctgggcaagtacgaaagagccaccacaa  
gaaggagccggatftgacctgggagactcgagagctctgatcgacttctcaagaagagcagcagagacacgagactggaagaagttcgacttcaagttcag

cgacaccagcacctaccaggacatcagcgagttctacagagaggtggagcagcagggctacaagatgagcttcagaaaagtgagcgtggactacatcaagag  
cctggtggaggaggaaagctgtacctgtccagatctacaacaaggacttcagcgcacctctaagggaacaccaatgcacacctgtactggaagatgct  
gttcgacgagggagaacctgaaaggacgtggtgtacaagctgaacggagagggcaggtgtcttcagaaaagcagcagcaccgtgcagagccctacacatcct  
gccaacagcccatcaagaacaagaacaaggacaaccagaagaaggagagcaagttcagctgacacctgatcaaggacagaagataaccctggacaagttc  
ctgtccacgtgccccatcacatgaactcaagagcgtggcggcagcaacatfaaccagctggtgaagagacacatcagaagcggccaccgacctgcacattac  
ggcatcgcagagggcgaagacacctgctgtacctgacctgacgcagcagagggcaacatcaaggagcagttcagcctgaacgagatcgtgaacgagtaca  
acggcaacacctacagaaccgactaccagagctgctggacacaagagagggcgaagaaccgagggcagaagaactggcagacctccagaacatcag  
agagctgaaggagggtatctgagccaggtgatccacaagatcagcgagctggccatcaagtaacaacgccgtgatcgtgctggaggacctgaacttcggcttcat  
gagaagcagacagaaggtggagaagcaggtgtaccagaagttcgagaagatgctgatcacaagctgaactacctggtggacaagaagaagcccgtggctga  
aacaggaggactgctgagacctatcaactgaccggcggagttcgagagctttaagacctgggcaagcaaaagcggcatcctgtttctacgtgccgcttgaaca  
ccagcaagatcgtcccgtgaccggcttgaacctgttcgacaccactacgagaacatcagagaaggccaaggtgttcttcgacaagtcaagagatcagata  
caacagcgacaaggactggttcgagttcgtggtggacgactacaccagattcagcccaaggccgaaggaaaccagaagagactggacctctgacccagggg  
caagagaatccagatctgcagaaaccaccagagaacaacgagtgaggaggccaagaatcagacctgaccaagcctcaaggagcacttcgaggcctatgg  
cgtggacatcagcaaggacctgagagagcagatcaacaccagaacaagaaggagttcttcgaggagctgctgagactgctgagactgacctgcagatgaga  
aacagcatgccagcagcagacatcactgactacatcagccccgtggtaatgacacaggctgcttcttcgacagcagaagcagggccgagctgaaggaaaatg  
ccgtgctgctatgaatgccgatgccaacggagcttacaacatgccgaaaaggcctgctggccatcagaagatgaagcaggaggagaacgacagcgcca  
aaatcagcctggccatcagcaacaaggagtggtgctgaagttcgtcagaccaagcctatctggaggactga

>Lb4Cas12a (codon-optimised DNA sequence)

atgggactgtatgacggctctgaacagatacagcgtgagcaagacctgagattcagctgatccccagggaagaaccagagagtacatcagaccaacg  
gcatcctgagcgacgatgaggagagagccaaggactacaagaccatcaagagactgatcgcaggtaccacaaggactacatcagcagatgcctgaagaacg  
tgaacatcagctgcctggaggagtactaccacctgtacaacagcagcaacagagacaagagacacgaggagctggatgctctgagcgaccaaatgagagggc  
agatcggccgcttctgaccggcaacgagctacaagagcagaagagcagagacatcatcaacgagagaatcatcaacttcgcaaccgatgaaga  
actggccgccgtgaagagattcagaagtaccagctactcaccggcttctccaacagagagaacatgtacagcgccgagaagaagtctacagccatcgc  
ccacagaatcatcagctgaacctgcccaagctggtgacaacatcaaggccttaacaccgctattgaagccggcgtgttcgataatgccggttcgagagcaa  
cttcaaggccatcaccgacgaacatgaggtgagcagctgctggacatcacaagctacagcagattcatcagaaacgaggacatcactctacaacacctgct  
ggcgccattagatgaaggacgagaagatccaggcctgaacgagctgatcaacctgcacaaccagaagcaccggcaaaaaggtgcctctgctgaaggt  
gctgtacaagcagatcctggcgacagccagacacatagcttctgagcagaccagttcagagatgaccagcaggtgatcaacggcgtgaaggctgtgaccgac  
acctttagcagacctgctgggaagcctgaagatcatcaacaacatcggccactacgacctggacagaatctacatcaagccggccaggacattacaac  
ctgagcaagagagccctgaacgactggcactatcaccagtgctgagctgagctgagcagaagttcccaagaacaagaagagcagacacctacgag  
gagatgagaacagatactgaagagctcaagagcttcagatcggcagactgaacgacctggtgaccacctataaccgagcaagcctgcttctggagaattac  
ctggcgagcttcggaggcgataccgacaagaactgcctgaccgacttccaacagcctgatggaggtggagcacctgctgaacagcgaataccccgtgacca  
acagactgatcaccgactacgagagcgtgagaatcctgaagagactgctggacagcgagatggaggtgatccacttctgaaacacctgctggcaatggaac  
gagagcgacaaggacctggtgttctacggcgagttcgagccgagctacgaaaactgctgcccgtgatcaaggtgtacaacagagtgagaactacctgacca  
gaaagccctcagcaccgagaagatcaagctgaactcaacagccccactgctgtgtggatggagccagagcaaggagaaggagtagatggcgtgatcct  
gagaaaggacggccgactacctgggaatcatgacccccgcaacaagaagatcttcagcagaggtcccaagcctgatgaagactgtacgagaagatggtg  
ctgagatacatccccacctatcagatgctgccaaggtgttcttcagaagagcaacatcgccttctcaacccagcagagatcctgagaatcaagaagc  
aggagagcttcaagaaggcaagagcttcaacagagacgactgccacaagttcatcgacttctacaaggacagatcaacagacagaggagtgagaaagtt  
caactcaagttcagcgacaccgacgctacgaggacatcagcagattctacaaggaggtggagaaccaggccttcagcatgagcttccaagatccccaccg  
tgtacatcagatgctggtggagcagggaaagctgtacctgtcaagctgcacaacaaggacttcagcagcagcaaggcgaacccaacctgcacaccgtt  
tactggaacccctgttcagcagtagtaacctgcagaacacctgtaccagctgaacggaaagcggcagatcttctcagaaaaggccagcatccccgagaacga  
gagagtgatccacaagaagaacgtgccccatcaccagaaaagtgccgagctgaacggcaaaaaggaggtgagcgtgttccctacgacatcatcaagaacag

aagatacacctggacaagttccagttccacgtgccctgaagatgaactcaaggccgacgagaagaagaatcaacgacgacgtgacgagccatcaga  
agcaacaaggcatccacgtgacggaaatcgacagaggcgagagaaacctgctgtacctgagcctgatcaacgaggaggcagaatcatcgagcagagaagc  
ctgaacatcatcgacagcggcgaaggccataccagaactacagagacctgctggacagcagagagaaggacagagaaggccagagagaactggcagg  
agatccaggagatcaaggacctgaagaccggctatctgagccaagccatccacaccatccaagtggatgaaggagtacaacgccatcatcgtgctggagga  
cctgaacgacagattaccaacggcagaaagaagggtggagaagcaggtgtaccagaagttcgagaagatgctgacgaagctgaactactcgtggacaag  
gacgaggagttcgacagaatggcggcacacatagagctctgcaactgaccgagaagttcgagagcttcagaagctgggaagacagaccggcttcatctta  
tgtgcccgcctggaacacatctaagctggatcccacaaccggattcgtggacctgctgtacccaagtacaagagcgtggacgccaccaaggacttcatcaaga  
gttcgacttcatcagattcaacagcgagaagaactactcaggttcggcctgcaactacagcaactcaccgagagagccatcggatgcagagacgagtgatcctg  
tgcagctacggcaacagaatcgtgaactcagaaacgccgccaagaacaacagctgggactacaaggagatcgacatccaagcagctgctggacctgtg  
agaagaacggcatcgacgtgaagcaggagaacctgacgacatctgcgagatgaaggacaagcccttctcaagagcctgatcgccaacatcaagctgatc  
ctgcagatcagaacagcgctagcggcaccgacatgactacatgatcagccccccatgaatgacagagggcaggttcttcgacaccagaaggcctgcaac  
aactgcctctggacgctgatgtaacggcgcctataacatcgccaagaaggcctgtggatcgtggaccagatcagaaacaccaccggcaacaacgtgaagatg  
gcatgagcaacagagagtgatgcacttcgccaggaaagcagacttctga





however, even 10-nt guide sequence of crRNA enabled the cleavage of ssDNA by Cas12a. Schematic of the target DNA (target-T1) and the crRNAs was shown in the lower panel. **(e)** Time-course cleavage experiment. FAM was labelled on the 3'-end of the T-strand of dsDNA or target ssDNA, with the schematic of DNA substrates shown in the lower panel. Target sequence was shown in red and the PAM site of "TTC" was shown in yellow. **(f)** Quantification of the Cas12a DNA cleavage activity on dsDNA and ssDNA substrates. Cleavage assays were conducted in triplicate and data were represented as mean  $\pm$  SEM.

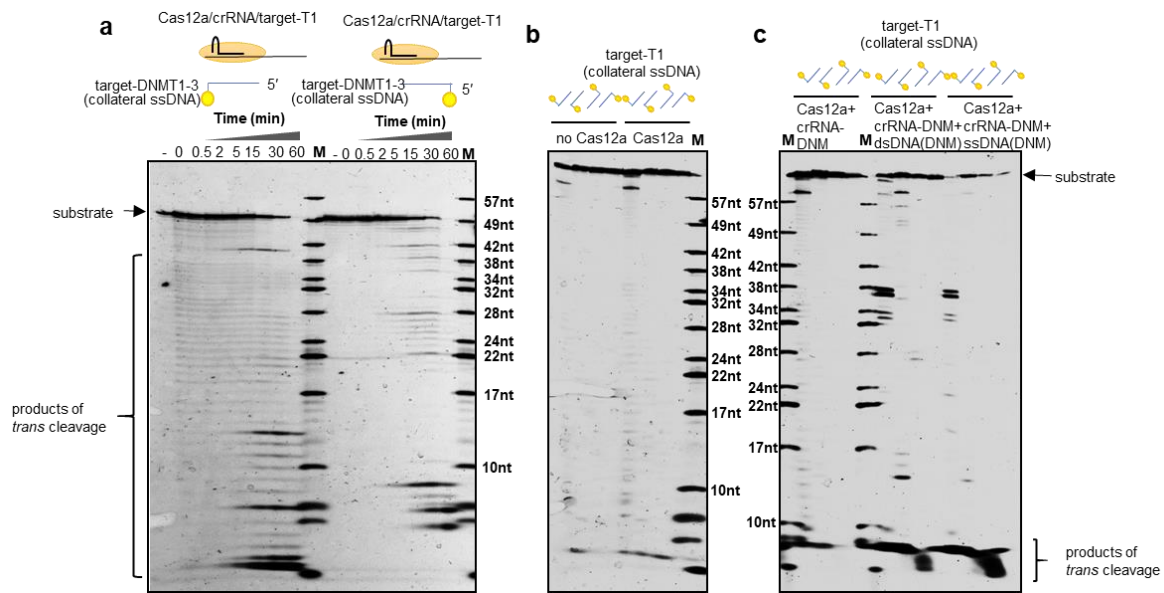

**Figure S2** The Cas12a *trans* cleavage activity on ssDNA. **(a)** Time-course cleavage of DNMT1-3 ssDNA in the presence of Cas12a/crRNA-T1-24nt/target-T1 complex. Collateral ssDNAs (DNMT1-3) labelled with FAM at either the 3'-end (left part) or 5'-end (right part) were promiscuously cleaved. The concentration of crRNA and Cas12a used here was reduced to 100 nM each. **(b and c)** Cleavage of FAM-labelled collateral ssDNAs (i.e. target-T1-F-FAM, target-T1-R-FAM, target-T1-FAM-3'-F and target-T1-FAM-5'-R) by Cas12a **(b)** or its complex **(c)**. Digestion reactions with no Cas12a or only Cas12a were employed as negative controls **(b)**. When only Cas12a and crRNA-DNMT-23nt were added, collateral ssDNAs (target-T1, FAM-labelled) could not be cleaved. However, upon the formation of the ternary complex of Cas12a/crRNA-DNMT-23nt/target-DNMT1-3 (dsDNA or ssDNA) **(c)**, collateral ssDNAs (target-T1, FAM-labelled) were *trans* cleaved.

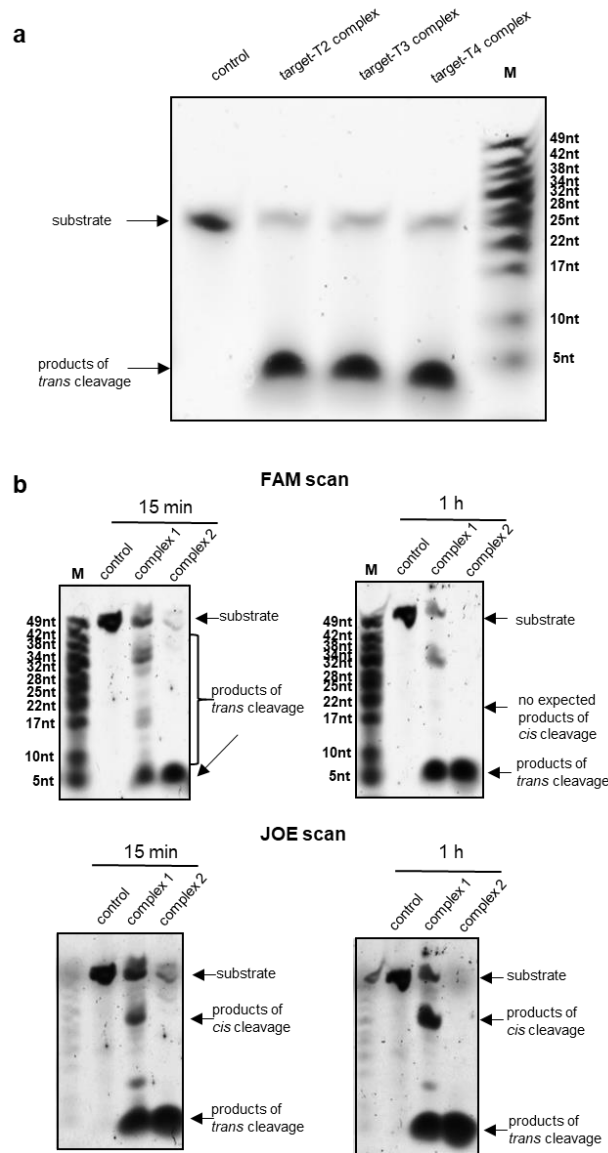

**Figure S3** Cas12a-mediated *cis*- and *trans*-cleavage of ssDNA. **(a)** Collateral ssDNA substrate N25-3'FAM was *trans*-cleaved by the Cas12a complexes. All complexes, including Cas12a/crRNA-T2/target-T2, Cas12a/crRNA-T3/target-T3 and Cas12a/crRNA-T4/target-T4, had the ssDNA *trans*-cleavage activity. **(b)** Cleavage of double-end labelled ssDNA substrate (target-DNMT1-3-R-FAM-5'-JOE-3'), which was labelled with 5'-FAM and 3'-JOE. Double-end labelled ssDNA was cleaved for 15 min and 1 h by complex 1 (Cas12a/crRNA-DNMT-23nt/target-DNMT1-3-R-FAM-5'-JOE-3') or complex 2 (Cas12a/crRNA-T1/target-T1-24-R). 3'-JOE-labelled *cis*-cleavage product (about 30 nt) only appeared with JOE scan, and no 5'-FAM-labelled *cis*-cleavage product (expected at 20 nt) could be observed.

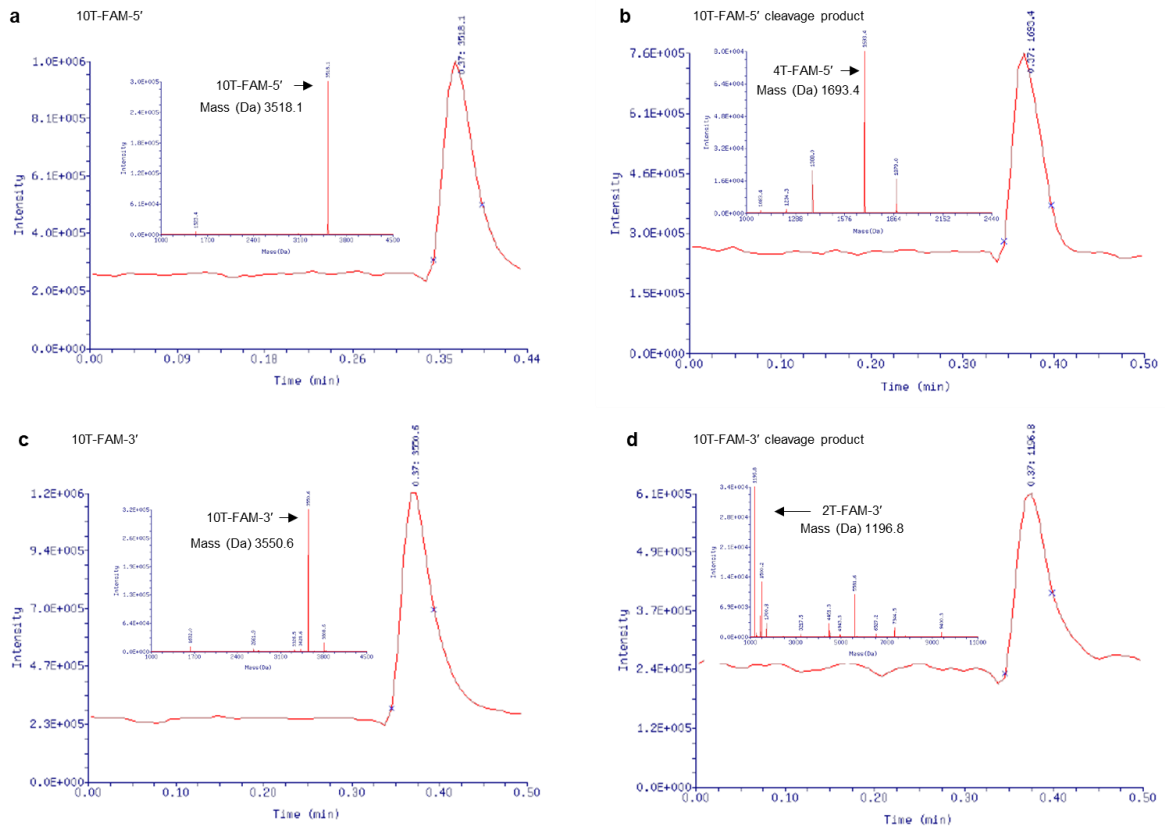

**Figure S4** Analysis of ssDNA by LC-MS. Analysed ssDNAs included 10T-FAM-5' (**a**), 10T-FAM-3' (**c**) and their corresponding products (**b** and **d**) *trans*-cleaved by complex of Cas12a/crRNA-T1/target-T1-18-R. The main cleavage product of substrate 10T-FAM-5' was 4T-FAM-5' with the molecular weight of 1693.4 (**b**), and main cleavage product of 10T-FAM-3' was 2T-FAM-3' with the molecular weight of 1196.8 (**d**).



**Figure S5** Multiple sequence alignment of Cas12a proteins. The RuvC and Nuc domains were labelled above the amino acid sequences, and key residues were indicated by coloured triangles. Fn, *Francisella tularensis*; As, *Acidaminococcus* sp. BV3L6; Lb, *Lachnospiraceae* bacterium ND2006; Lb5, *Lachnospiraceae* bacterium NC2008; Hk, *Helcococcus kunzii* ATCC 51366; Os, *Oribacterium* sp. NK2B42; Ts, *Thiomicrospira* sp. XS5; Bb, *Bacteroidales* bacterium KA00251; Bo, *Bacteroidetes* oral taxon 274 str. F0058; Lb4, *Lachnospiraceae* bacterium MC2017.

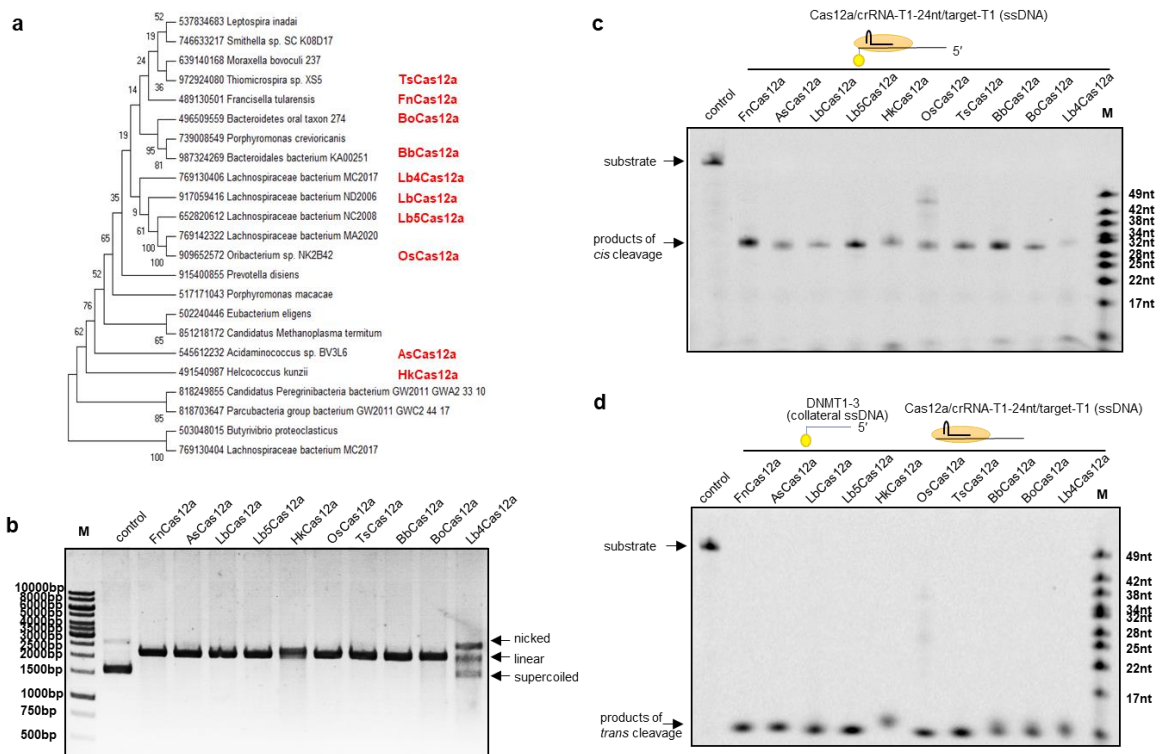

**Figure S6** Characterization of the *cis* and *trans* cleavage activities of ten Cas12a proteins from different species. **(a)** A phylogenetic tree of partial Cas12a-family proteins, among which ten were chosen for further biochemical analyses and were indicated in red. **(b)** Cleavage of plasmid pCB1A2\_2 by ten different Cas12a proteins with crRNA-T1-24nt. **(c)** *Cis* cleavage of the ssDNA target-T1 by ten different Cas12a proteins with crRNA-T1-24nt. All Cas12a proteins showed *cis* cleavage activity. **(d)** *Trans* cleavage of the ssDNA target-DNMT1-3 by the complex of Cas12a/crRNA-T1-24nt/target-T1 (ssDNA). All Cas12a complexes showed *trans* cleavage activity.



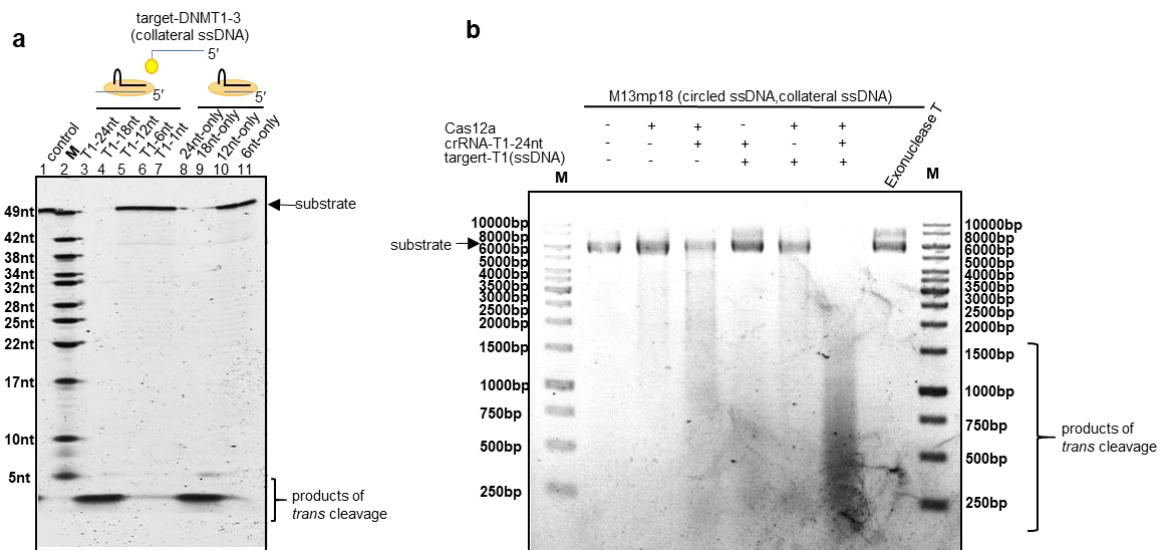

**Figure S7** The Cas12a *trans* cleavage activity on ssDNA. **(a)** *Trans* cleavage of collateral ssDNA (target-DNMT1-3) by the Cas12a complex with different lengths of target ssDNA. In lanes 3-7, 3'-extended sequences were designed on the target ssDNA, which was indicated in the schematic; lanes 8-11, there were no extended sequences beyond the 3' terminal of the target ssDNA. The crRNA-T1-24nt was used in the assay, and detailed information of the target ssDNAs used could be found in Extended Data Table 1. **(b)** Cas12a *trans* cleavage of circular target ssDNA of M13mp18. Once the ternary complex of Cas12a/crRNA/target DNA formed, circular ssDNA M13mp18 was promiscuously cleaved. Exonuclease T (Exo T), which is a single-stranded RNA- or DNA-specific nuclease that requires a free 3' terminus and removes nucleotides in the 3' to 5' direction, showed no cleavage activity on circular M13mp18 and was therefore employed as a negative control.

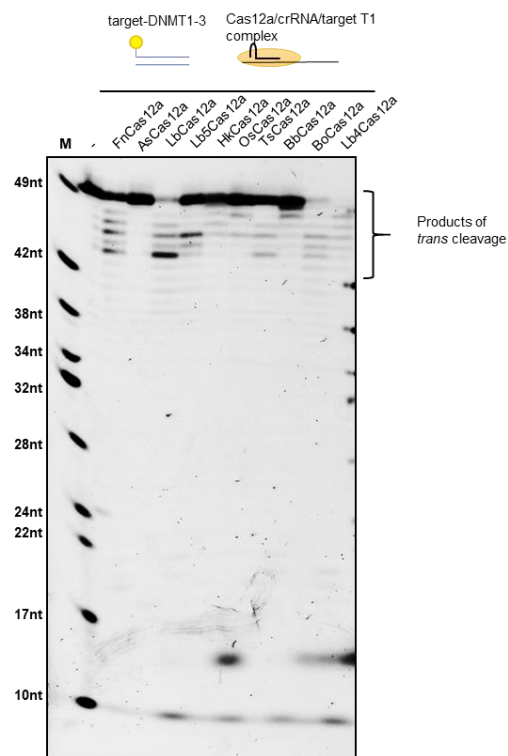

**Figure S8** *Trans* cleavage of dsDNA substrate by ten different Cas12a complexes. Upon the formation of Cas12a/crRNA-T1/target-T1 (ssDNA), most Cas12a complexes (except AsCas12a) had *trans* cleavage activity on the ends of dsDNA substrate of target-DNMT1-3, among which the activity of LbCas12a, BoCas12a and Lb4Cas12a complexes was much higher.

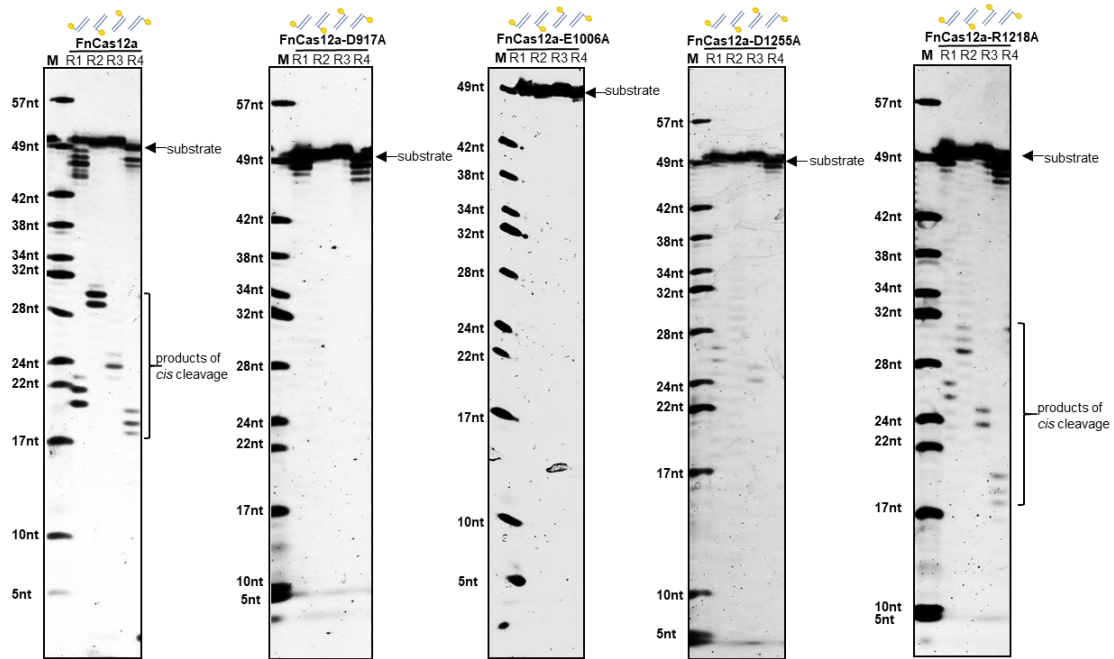

**Figure S9** Identification of the cleavage sites in double-stranded DNMT1-3 by FnCas12a and its mutants (D917A, E1006A and D1255A mutations in the RuvC domain; R1218A mutation in the Nuc domain), employing crRNA-DNMT-23nt and FAM-labelled dsDNA. Labelling of targets was indicated above each lane, i.e. R1: 5'-labelled non-target strand, R2: 3'-labelled target strand, R3: 3'-labelled non-target strand, and R4: 5'-labelled target strand. All mutants showed either weakened or completely lost activity on dsDNA cleavage.

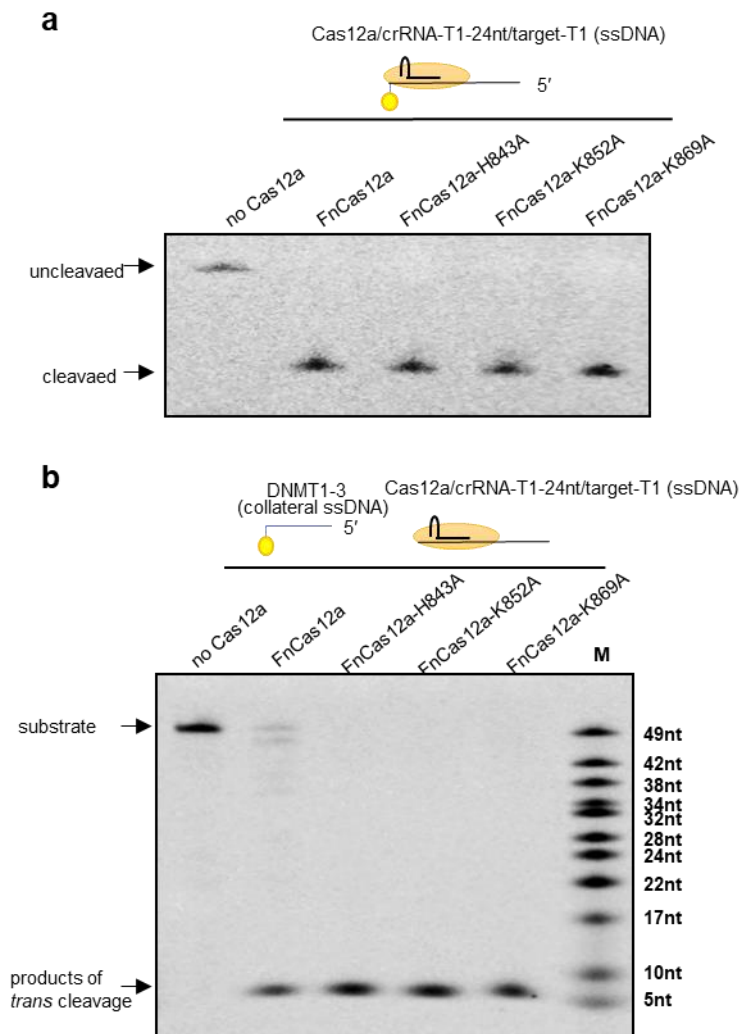

**Figure S10** Identification of key residues in Cas12a that were involved in the *cis* and *trans* ssDNA cleavage. **(a)** *cis* cleavage of target ssDNA (target-T1-R-FAM) by FnCas12a and three FnCas12a mutants with single amino acid replacement in H843, K852 and K869, which are associated with the RNase activity. No significant difference was found in the *cis* cleavage activity among the tested Cas12a proteins. **(b)** *Trans* cleavage of the 3'-FAM-labelled collateral ssDNA of target-DNMT1-3-R by the ternary complexes of wild-type FnCas12a or its mutants. The three tested residues (H843, K852 and K869 in FnCas12a) are associated with the RNase activity. No significant difference was found in the *trans* cleavage activities among the tested Cas12a proteins.

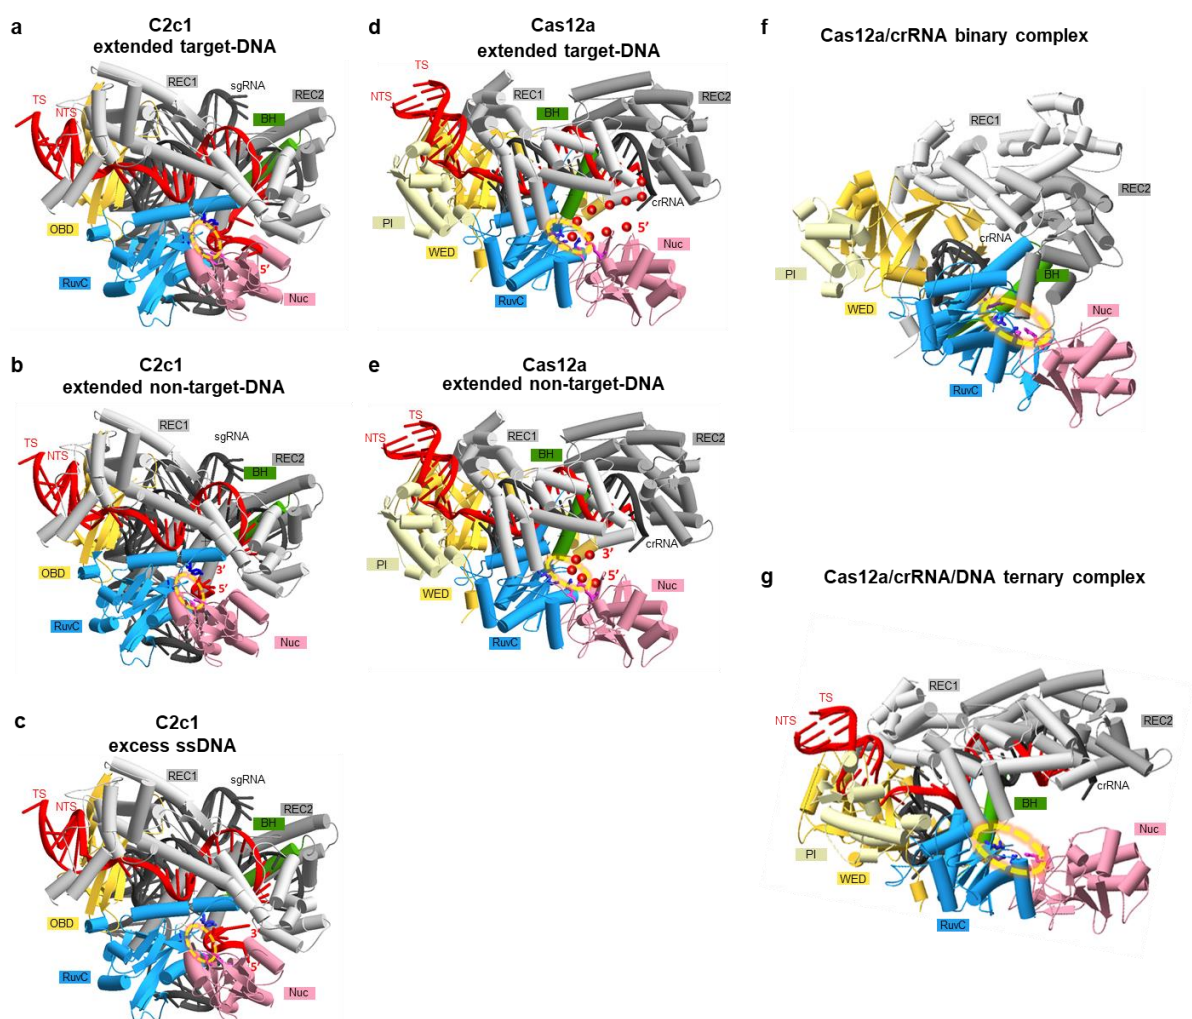

**Figure S11** The RuvC catalytic pocket model for C2c1 and Cas12a. **(a-c)** C2c1 complex: the ternary complex C2c1 with sgRNA and extended target DNA (PDB: 5U30 in Figure S11a), extended non-target DNA (PDB: 5U33 in Figure S11b) and excess ssDNA (PDB: 5U31 in Figure S11c). All above substrate DNAs were positioned in the RuvC catalytic pocket (labelled in dashed yellow circle). **(d-e)** Cas12a complex (PDB: 5B43): the ternary complex of Cas12a with crRNA and proposed extended target DNA (Figure S11d) and extended non-target DNA (Figure S11e). Red dots represented the proposed positions of extended target-DNA and non-target-DNA. **(f-g)** Figure S11f represented the binary complex Cas12a/crRNA with a triangle-shaped structure (PDB: 1WJX) and Figure S11g represented the ternary complex Cas12a/crRNA/DNA with a bilobed architecture (PDB: 5B43). Molecular graphic images were prepared using CueMol (<http://www.cuemol.org>). DNA was colored in Red, RNA was colored in black and the RuvC catalytic pocket was indicated by dashed yellow circles.

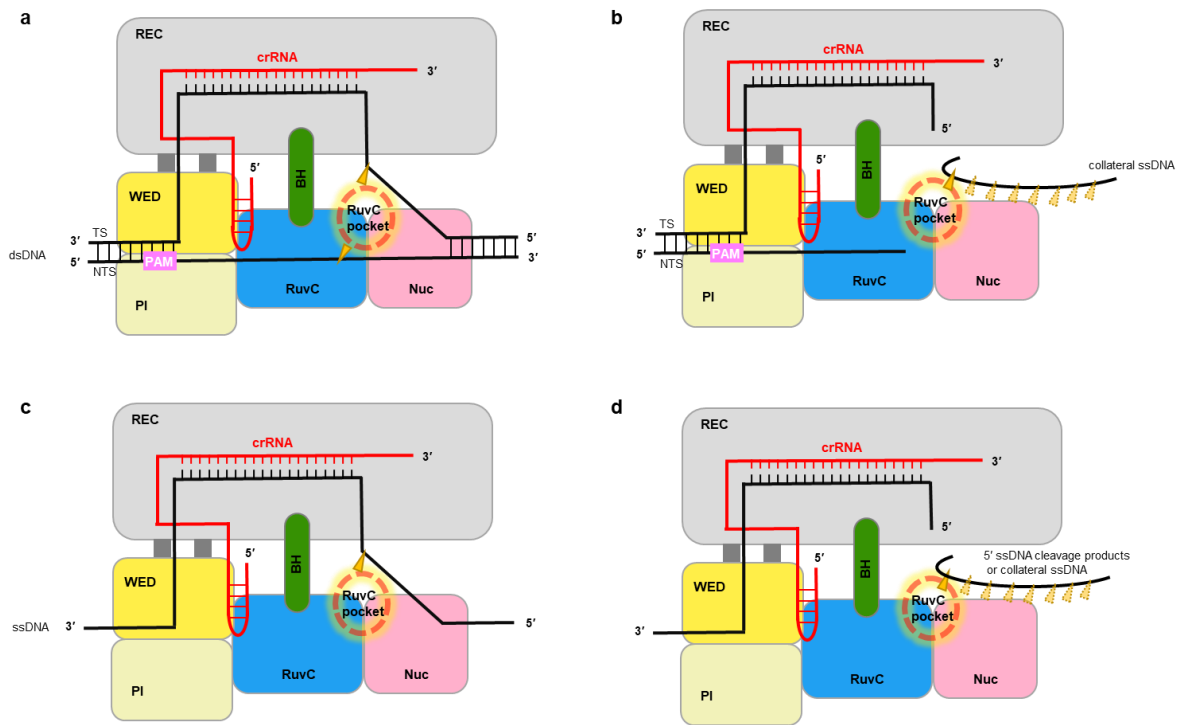

**Figure S12** The Cas12a cleavage models. Substrates included target dsDNA **(a)**, collateral ssDNA *trans*-cleaved by the ternary complex of Cas12a/crRNA/target dsDNA **(b)**, target ssDNA *cis*-cleaved by the Cas12a complex **(c)** and *cis*-cleaved ssDNA which was then *trans*-cleaved by the Cas12a complex **(d)**. All substrate DNAs were proposed to be cleaved by the active sites in the Cas12a RuvC pocket.

## References

1. Li, S. Y., Zhao, G. P. & Wang, J. C-Brick: A New Standard for Assembly of Biological Parts Using Cpf1. *ACS Synth. Biol.* **5**, 1383-1388 (2016).
2. Lei, C. *et al.* The CCTL (Cpf1-assisted Cutting and Taq DNA ligase-assisted Ligation) method for efficient editing of large DNA constructs *in vitro*. *Nucleic Acids Res.* **45**, e74 (2017).
3. Carneiro, F. R. *et al.* Spectroscopic characterization of the tumor antigen NY-REN-21 and identification of heterodimer formation with SCAND1. *Biochemical and biophysical research communications* **343**, 260-268 (2006).
